# Supplementary material for: Spreading of a mycobacterial cell-surface lipid into host epithelial membranes promotes infectivity
Source: eLife. 2020 Nov 23;9:e60648. doi: 10.7554/eLife.60648 (PMC7735756; doi:10.7554/eLife.60648)
Supplement: Figure 1—figure supplement 1—source data 1. [file elife-60648-fig1-figsupp1-data1.xlsx]

## Sheet: Supplemental Figure 1A
Time (Hours)	Control						Pet Ether
0	0.3472	0.3394	0.3145	0.4021	0.3978		0.4012	0.3365	0.3945	0.3654	0.3784
10	0.5342	0.4893	0.51238	0.4895	0.5231		0.5231	0.5312	0.5629	0.4987	0.4981
20	1.0422	1.0431	1.0103	1.0979			1.0743	0.9873	0.9872	1.0234	1.0983
35	1.8934	1.9874	1.8947	1.7456	1.6873		1.8734	1.5673	1.8357	1.6893	1.87432
69	3.01843	3.1234	3.2453	3.1089	3.2498		3.0083	2.8743	2.9473	3.1293	3.0123
90	3.1234	3.2134	3.1243	3.2194	3.3561		3.1234	3.2142	3.1245	3.2145	3.3411

## Sheet: Supplemental Figure 1B
Initial	1	2	3	4	5
23.4	1.2	2	3.4	5.6	10.3
22.8	2.3	1.3	3.2	6	11
23.7	1.1	2.1	0.8	4.5	12

## Sheet: Supplmental Figure 1C
23mg lipid/gram bacteria	46mg lipid/gram bacteria
18.2	30.8
15.8	36.9
17.2	34.25
