# Supplementary material for: Spreading of a mycobacterial cell-surface lipid into host epithelial membranes promotes infectivity
Source: eLife. 2020 Nov 23;9:e60648. doi: 10.7554/eLife.60648 (PMC7735756; doi:10.7554/eLife.60648)
Supplement: Figure 1—source data 1. [file elife-60648-fig1-data1.xlsx]

## Sheet: Figure 1D
Control 1dpi	Delipidated 1dpi	Reconstituted 1dpi	Control 3dpi	Delipidated 3dpi	Reconstituted 3dpi
5684.14	12166	14039.4	18373	15774.4	30139.7
22571.3	17371.5	13613.4	24370.1	20862.8	25067.7
19813.4	18008.9	13493.5	38700.4	15502.1	18720.7
30293.5	4767.26	7472.9	15135.6	8861.81	28950.4
8710.32	22829.4	5932.71	25128.7	11702.9	22689.7
4868.7	17063.7	7820.51	34390.9	7082.79	22838.4
19243.7	5894.35	16226.6	19638	10109	38311.1
28334.5	16579.1	11783.8	29133	6895.92	22862.7
19111.5	20148.2	16962.3	34934.4	17358	17852
11151.1	15809.9	8635.22	13591.6	6520.64	21860.7
13158.6	10163.3	11367.2	35100	16968.8	15250
	13512.6	24146.4		20368.3	25594.1
		23270.2			17188.8
		11959.5			26359.5
		11861.5			23727.4

## Sheet: Figure 1F
wildtype control	wildtype + wildtype lipids	wildtype + ∆mmpL7 lipids	∆mmpL7 control	∆mmpL7 + ∆mmpL7 lipids	∆mmpL7 + wildtype lipids
14848.5	10167.8	3263	3635.66	2460.49	6256.67
12497.4	11392.4	1241	3913.97	3919.82	3808.07
7382.31	9827.84	1.46	1299.98	2358.8	5699.98
6934.21	7318.64	5422.29	1938.65	3915.51	8044.02
9970.68	18572.3	2026.64	450.656	1192.16	8766.52
9336.58	6460.28	4419.61	3249.87	5683.45	14360.6
15931.9	16312.5	6389.15	941.489	4541.62	5228.97
11367.6	10659.7	2916.62	1541.02	3267.92	4361.37
20279.2	12342.6	6488.67	2954.85	2108.9	15522.7
18459.9	11782.9	5367.11	3260.64		7393.27
3663.43	6275.05		3857.21		13124.7
	20320.5		3576.29		10222.1
	18530.2				12396.2
	6143

## Sheet: Figure 1G
∆mmpL7 control in wildtype fish	∆mmpL7 control in MYD88-depleted fish	∆mmpL7 + ∆mmpL7 lipids in wildtype fish	∆mmpL7 + ∆mmpL7 lipids in MYD88-depleted fish	∆mmpL7 + wildtype lipids in wildtype fish	∆mmpL7 + wildtype lipids in MYD88-depleted fish
22	3	11	6	8	13
31	3	13	3	8	7
10	7	15	5	12	5
11	6	12	9	12	12
8	2	14	2	6	6
14	11	13	1	19	9
24	6	21	3	21	13
12	5	7	2	24	14
12	1	9	2	9	8
10	3	8	5	8	15
9	12	11	4	6	20
18	5	13	3	14	10
14	3	8	1	20	9
12	3	12	3	15	8
10	3	12	1		13
	2		4		9
	5		0		9
	8		3		4
	5				12
	1				15
	1				17
					7
