# Supplementary material for: Spreading of a mycobacterial cell-surface lipid into host epithelial membranes promotes infectivity
Source: eLife. 2020 Nov 23;9:e60648. doi: 10.7554/eLife.60648 (PMC7735756; doi:10.7554/eLife.60648)
Supplement: Figure 2—source data 1. [file elife-60648-fig2-data1.xlsx]

## Sheet: Figure 2F
native lipids	DIM–	DIM– +DIMs	DIM– +Azido-DIM
18069	8705.25	12218.2	19621.4
10597.8	1808.46	13232.9	17523.2
12686.8	1728.17	6324.88	14503.6
7785.38	3549.47	12530.5	4485.71
8538.76	3204.67	1478.88	14752.8
13093.5	1114.44	16720.5	18950.9
10492.3	4582.58	43479.9	19205.5
15439.3	3394.21	9589.77	17763.4
12730.4	4074.6	3601.9	18475.7
10720.6	1835.71	5430.87	13836.9
4621.58	5066.61	5123.28	13222.9
30977.1	10874.7	20251.4	7035.22
			13677
