# Supplementary material for: Spreading of a mycobacterial cell-surface lipid into host epithelial membranes promotes infectivity
Source: eLife. 2020 Nov 23;9:e60648. doi: 10.7554/eLife.60648 (PMC7735756; doi:10.7554/eLife.60648)
Supplement: Figure 3—source data 1. [file elife-60648-fig3-data1.xlsx]

## Sheet: Figure 3C
0 dpi	1 dpi	3 dpi
19.5952	54.4637	73.524
7.48974	25.3568	58.9882
13.2762	25.8222	38.1069
12.3002	41.5874	59.2123
6.16958	35.2826	63.2517
7.00228	20.842	94.7353
6.89362	20.4983	73.4271
11.423	40.5759	65.9388
14.8181	44.609	68.6653
4.93629	49.3184	41.0924
26.6424	26.86	51.1762
8.2783	30.4473	55.8027
5.12407	45.6581	71.0807
16.0076	39.524	63.9297
5.06732	36.385	89.5271
8.56679	25.2614	60.7795
24.669	47.6818	41.5464
9.21499	34.943	48.6259
8.68484	29.6776	87.5583

## Sheet: Figure 3F
Ctrl 0dpi	Recon 0dpi	Ctrl 1dpi	Recon 1dpi
51.0109	43.7474	44.4106	50.749
34.92	47.5577	58.4339	53.7008
56.1743	40.7548	71.8236	62.9779
31.5449	40.5837	46.0525	77.9436
41.0205	56.99	66.8406	63.0081
45.8938	50.9879	63.1978	57.3474
37.7122	50.997	56.1606	61.4833
59.0261	47.8513	78.0956	59.8946
31.9404	35.6411	75.4536	51.7332
29.8466	39.1814	59.4279	65.3567
48.84	23.6291	69.9015	56.7537
50.1369	42.628	39.3358	63.7149
49.7703	37.2659	79.0036	36.734
52.177	41.2539	77.7021	55.656
49.254	31.3641	70.0503	69.3604

## Sheet: Figure 3G
WT 0dpi	∆RD1 0dpi	WT 1dpi	∆RD1 1dpi
8.82991	5.93302	41.2221	55.201
12.4949	11.4466	52.6479	45.9386
5.89332	6.45887	32.343	39.378
8.12516	14.8036	20.4707	48.7048
8.30806	12.7363	30.8982	30.9705
10.9286	21.8597	25.2746	48.5786
11.7259	14.0313	71.809	43.9103
24.1951	18.0911	45.0892	33.8019
11.7907	19.7514	58.8218	39.801
9.36022	14.6752	19.2339	40.4405
11.1453		37.1906
14.3087		25.1925
4.97775		42.3984
10.0135		29.4519

## Sheet: Figure 3H
Time Min	WT				∆mmpL7
0	100	100	100	100	100	100	100	100
2.5	104.054	95.1219	100	93.3333	95.6522	97.8022	105.882	101.852
5	109.46	95.1219	103.448	97.1429	92.7536	101.099	105.882	96.2963
7.5	106.757	97.561	100	98.0952	97.1014	102.198	97.0588	96.2963
10	102.703	98.7805	94.8276	91.4286	95.6522	101.099	94.1176	98.1482
12.5	108.108	93.9024	105.172	93.3333	91.3043	95.6044	91.1765	96.2963
15	105.405	87.8049	93.1034	96.1905	92.7536	95.6044	98.5294	96.2963
17.5	102.703	84.1463	98.2759	94.2857	89.8551	101.099	92.6471	94.4444
20	106.757	87.8049	89.6552	100	84.058	92.3077	89.7059	87.037
22.5	104.054	89.0244	87.931	92.3809	94.2029	97.8022	94.1176	92.5926
25	105.405	89.0244	105.172	97.1429	86.9565	96.7033	94.1176	88.8889
27.5	100	87.8049	100	93.3333	85.5072	103.297	94.1176	87.037
30	109.46	81.7073	101.724	90.4762	89.8551	90.1099	104.412	94.4444
32.5	108.108	82.9268	96.5517	97.1429	94.2029	97.8022	97.0588	88.8889
35	104.054	93.9024	105.172	93.3333	91.3043	92.3077	94.1176	94.4444
37.5	106.757	90.2439	110.345	91.4286	88.4058	96.7033	89.7059	85.1852
40	100	86.5854	110.345	86.6667	86.9565	90.1099	88.2353	87.037
42.5	98.6487	93.9024	98.2759	84.7619	84.058	93.4066	86.7647	90.7407
45	98.6487	85.3658	106.897	82.8571	88.4058	92.3077	85.2941	90.7407
47.5	101.351	78.0488	103.448	81.9048	88.4058	102.198	89.7059	96.2963
50	100	73.1707	101.724	78.0952	82.6087	97.8022	94.1176	92.5926
52.5	98.6487	79.2683	101.724	67.6191	82.6087	95.6044	95.5882	96.2963
55	101.351	80.4878	101.724	80	86.9565	100	91.1765	87.037
57.5	104.054	79.2683	110.345	79.0476	82.6087	94.5055	88.2353	90.7407
60	110.811	74.3902	108.621	78.0952	81.1594	96.7033	92.6471	81.4815
62.5	116.216	73.1707	100	75.2381	79.7101	102.198	91.1765	90.7407
65	112.162	69.5122	101.724	82.8571	79.7101	100	97.0588	92.5926
67.5	114.865	69.5122	101.724	83.8095	82.6087	101.099	94.1176	90.7407
70	112.162	71.9512	98.2759	77.1429	85.5072	94.5055	89.7059	81.4815
72.5	109.46	70.7317	98.2759	80.9524	81.1594	97.8022	88.2353	87.037
75	110.811	78.0488	96.5517	75.2381	82.6087	97.8022	82.3529	90.7407
77.5	108.108	76.8293	96.5517	75.2381	78.2609	96.7033	85.2941	88.8889
80	101.351	73.1707	103.448	79.0476	79.7101	93.4066	88.2353	77.7778
82.5	108.108	75.6098	96.5517	75.2381	75.3623	86.8132	86.7647	75.9259
85	106.757	74.3902	98.2759	80.9524	76.8116	90.1099	80.8824	79.6296
87.5	114.865	76.8293	98.2759	75.2381	81.1594	92.3077	83.8235	83.3333
90	116.216	75.6098	96.5517	76.1905	82.6087	90.1099	83.8235	83.3333
92.5	120.27	76.8293	96.5517	76.1905	86.9565	87.9121	82.3529	81.4815
95	116.216	75.6098	94.8276	76.1905	84.058	83.5165	79.4118	77.7778
97.5	118.919	73.1707	94.8276	78.0952	86.9565	85.7143	83.8235	77.7778
100	127.027	67.0732	100	78.0952	79.7101	89.011	82.3529	70.3704
102.5	114.865	70.7317	94.8276	76.1905	86.9565	87.9121	83.8235	75.9259
105	117.568	69.5122	100	76.1905	81.1594	90.1099	80.8824	77.7778
107.5	117.568	65.8537	101.724	74.2857	84.058	91.2088	82.3529	77.7778
110	110.811	73.1707	96.5517	68.5714	86.9565	92.3077	83.8235	83.3333
112.5	113.513	68.2927	96.5517	70.4762	79.7101	82.4176	86.7647	79.6296
115	113.513	68.2927	89.6552	73.3333	81.1594	85.7143	83.8235	83.3333
117.5	113.513	74.3902	89.6552	71.4286	81.1594	85.7143	79.4118	87.037
120	113.513	71.9512	93.1034	78.0952	79.7101	86.8132	82.3529	88.8889
122.5	106.757	67.0732	96.5517	72.3809	75.3623	80.2198	85.2941	85.1852
125	109.46	70.7317	94.8276	75.2381	78.2609	89.011	83.8235	83.3333
127.5	118.919	69.5122	86.2069	75.2381	78.2609	87.9121	82.3529	74.0741
130	118.919	69.5122	93.1034	76.1905	76.8116	93.4066	80.8824	77.7778
132.5	117.568	70.7317	98.2759	74.2857	75.3623	84.6154	88.2353	72.2222
135	112.162	68.2927	93.1034	73.3333	76.8116	87.9121	83.8235	75.9259
137.5	112.162	69.5122	100	80	79.7101	90.1099	83.8235	83.3333
140	120.27	69.5122	91.3793	76.1905	71.0145	86.8132	85.2941	83.3333
142.5	117.568	69.5122	89.6552	76.1905	72.4638	93.4066	89.7059	85.1852
145	110.811	69.5122	87.931	77.1429	78.2609	94.5055	82.3529	81.4815
147.5	113.513	68.2927	93.1034	77.1429	76.8116	94.5055	82.3529	81.4815
150	112.162	67.0732	89.6552	78.0952	75.3623	87.9121	83.8235	83.3333
152.5	110.811	63.4146	89.6552	73.3333	73.913	93.4066	85.2941	81.4815
155	114.865	68.2927	86.2069	74.2857	75.3623	85.7143	86.7647	72.2222
157.5	112.162	67.0732	87.931	76.1905	79.7101	87.9121	85.2941	74.0741
160	109.46	67.0732	94.8276	76.1905	76.8116	87.9121	83.8235	70.3704
162.5	109.46	69.5122	93.1034	70.4762	78.2609	89.011	80.8824	70.3704
165	109.46	68.2927	87.931	71.4286	75.3623	86.8132	85.2941	70.3704
167.5	101.351	60.9756	89.6552	73.3333	81.1594	83.5165	83.8235	74.0741
170	102.703	62.1951	93.1034	74.2857	76.8116	85.7143	88.2353	70.3704
172.5	105.405	59.7561	86.2069	74.2857	75.3623	90.1099	88.2353	72.2222
175	104.054	59.7561	87.931	74.2857	78.2609	91.2088	86.7647	75.9259
177.5	106.757	63.4146	84.4828	79.0476	73.913	90.1099	79.4118	68.5185
180	105.405	63.4146	84.4828	76.1905	71.0145	94.5055	82.3529	68.5185
182.5	109.46	60.9756	86.2069	74.2857	72.4638	90.1099	85.2941	68.5185
185	108.108	63.4146	89.6552	74.2857	72.4638	86.8132	91.1765	70.3704
187.5	105.405	60.9756	84.4828	76.1905	71.0145	82.4176	92.6471	64.8148
190	101.351	62.1951	89.6552	78.0952	72.4638	87.9121	92.6471	66.6667
192.5	100	59.7561	86.2069	72.3809	78.2609	89.011	85.2941	72.2222
195	102.703	58.5366	87.931	70.4762	73.913	86.8132	86.7647	66.6667
197.5	104.054	60.9756	86.2069	68.5714	76.8116	87.9121	80.8824	68.5185
200	102.703	62.1951	84.4828	72.3809	72.4638	83.5165	82.3529	70.3704
202.5	101.351	63.4146	82.7586	71.4286	81.1594	89.011	83.8235	64.8148
205	104.054	62.1951	84.4828	71.4286	76.8116	94.5055	82.3529	66.6667
207.5	105.405	60.9756	87.931	74.2857	73.913	91.2088	83.8235	64.8148
210	104.054	60.9756	82.7586	68.5714	78.2609	94.5055	88.2353	64.8148
212.5	101.351	56.0976	79.3103	72.3809	76.8116	92.3077	88.2353	70.3704
215	98.6487	57.3171	81.0345	68.5714	75.3623	91.2088	91.1765	61.1111
217.5	94.5946	57.3171	79.3103	66.6667	79.7101	93.4066	92.6471	62.963
220	106.757	53.6585	82.7586	65.7143	76.8116	90.1099	85.2941	59.2593
222.5	95.9459	54.8781	82.7586	62.8571	79.7101	92.3077	85.2941	57.4074
225	102.703	54.8781	75.8621	60	78.2609	91.2088	82.3529	62.963
227.5	109.46	52.439	82.7586	62.8571	76.8116	96.7033	86.7647	62.963
230	101.351	52.439	79.3103	66.6667	82.6087	95.6044	86.7647	66.6667
232.5	105.405	48.7805	79.3103	68.5714	79.7101	92.3077	85.2941	64.8148
235	106.757	48.7805	79.3103	68.5714	78.2609	93.4066	91.1765	66.6667
237.5	98.6487	46.3415	75.8621	62.8571	75.3623	92.3077	86.7647	62.963
240	100	46.3415	81.0345	65.7143	75.3623	89.011	91.1765	68.5185
242.5	105.405	54.8781	79.3103	66.6667	71.0145	87.9121	88.2353	62.963
245	97.2973	54.8781	79.3103	61.9048	69.5652	89.011	86.7647	62.963
247.5	94.5946	54.8781	74.1379	62.8571	73.913	96.7033	82.3529	59.2593
250	93.2432	53.6585	72.4138	67.6191	66.6667	91.2088	85.2941	66.6667
252.5	98.6487	57.3171	81.0345	61.9048	62.3188	86.8132	82.3529	68.5185
255	97.2973	57.3171	75.8621	65.7143	63.7681	86.8132	83.8235	68.5185
257.5	97.2973	58.5366	79.3103	65.7143	65.2174	87.9121	83.8235	66.6667
260	98.6487	58.5366	81.0345	60	72.4638	87.9121	80.8824	57.4074
262.5	98.6487	60.9756	79.3103	62.8571	69.5652	86.8132	77.9412	57.4074
265	95.9459	56.0976	77.5862	62.8571	65.2174	85.7143	82.3529	61.1111
267.5	101.351	56.0976	77.5862	60.9524	66.6667	86.8132	77.9412	61.1111
270	98.6487	53.6585	75.8621	59.0476	62.3188	87.9121	80.8824	59.2593
272.5	100	56.0976	70.6897	60	62.3188	87.9121	76.4706	57.4074
275	102.703	50	77.5862	60	57.971	86.8132	79.4118	57.4074
277.5	98.6487	50	75.8621	58.0952	60.8696	87.9121	80.8824	57.4074
280	94.5946	53.6585	79.3103	60	59.4203	91.2088	79.4118	61.1111
282.5	89.1892	48.7805	70.6897	59.0476	66.6667	82.4176	77.9412	59.2593
285	87.8378	47.561	77.5862	60	65.2174	82.4176	82.3529	53.7037
287.5	87.8378	48.7805	72.4138	64.7619	60.8696	82.4176	79.4118	55.5556
290	91.8919	51.2195	72.4138	63.8095	65.2174	86.8132	75	57.4074
292.5	87.8378	50	72.4138	58.0952	65.2174	87.9121	72.0588	59.2593
295	87.8378	53.6585	72.4138	61.9048	62.3188	83.5165	73.5294	61.1111
297.5	86.4865	52.439	75.8621	59.0476	63.7681	81.3187	73.5294	61.1111
300	93.2432	48.7805	74.1379	59.0476	62.3188	87.9121	75	61.1111
302.5	91.8919	51.2195	70.6897	55.2381	66.6667	90.1099	73.5294	61.1111
305	95.9459	48.7805	72.4138	54.2857	66.6667	86.8132	72.0588	59.2593
307.5	94.5946	48.7805	67.2414	55.2381	65.2174	83.5165	70.5882	64.8148
310	94.5946	53.6585	70.6897	49.5238	65.2174	83.5165	72.0588	64.8148
312.5	87.8378	47.561	68.9655	51.4286	60.8696	85.7143	67.6471	62.963
315	93.2432	53.6585	67.2414	56.1905	62.3188	85.7143	72.0588	66.6667
317.5	93.2432	48.7805	67.2414	51.4286	62.3188	86.8132	70.5882	62.963
320	93.2432	47.561	67.2414	50.4762	66.6667	78.022	67.6471	64.8148
322.5	93.2432	48.7805	65.5172	53.3333	62.3188	79.1209	66.1765	59.2593
325	93.2432	43.9024	67.2414	51.4286	57.971	85.7143	70.5882	62.963
327.5	94.5946	45.1219	70.6897	51.4286	62.3188	84.6154	67.6471	62.963
330	93.2432	45.1219	65.5172	51.4286	57.971	80.2198	70.5882	61.1111
332.5	89.1892	43.9024	75.8621	48.5714	59.4203	83.5165	72.0588	55.5556
335	86.4865	42.6829	70.6897	46.6667	59.4203	80.2198	66.1765	57.4074
337.5	91.8919	39.0244	68.9655	47.6191	60.8696	78.022	67.6471	57.4074
340	90.5405	46.3415	70.6897	43.8095	52.1739	73.6264	67.6471	59.2593
342.5	87.8378	41.4634	68.9655	45.7143	52.1739	74.7253	67.6471	53.7037
345	90.5405	45.1219	67.2414	42.8571	57.971	79.1209	72.0588	55.5556
347.5	85.1351	47.561	68.9655	42.8571	52.1739	74.7253	76.4706	55.5556
350	86.4865	45.1219	67.2414	50.4762	55.0725	76.9231	72.0588	55.5556
352.5	89.1892	41.4634	62.069	43.8095	55.0725	76.9231	66.1765	53.7037
355	86.4865	39.0244	65.5172	47.6191	56.5217	72.5275	70.5882	53.7037
357.5	79.7297	40.2439	60.3448	46.6667	50.7246	72.5275	69.1176	51.8518
360	85.1351	40.2439	67.2414	45.7143	56.5217	76.9231	72.0588	48.1482
362.5	91.8919	40.2439	62.069	43.8095	53.6232	76.9231	67.6471	48.1482
365	83.7838	42.6829	62.069	46.6667	50.7246	70.3297	70.5882	50
367.5	85.1351	43.9024	58.6207	42.8571	53.6232	70.3297	69.1176	51.8518
370	85.1351	45.1219	63.7931	44.7619	53.6232	70.3297	70.5882	50
372.5	83.7838	42.6829	60.3448	41.9048	52.1739	70.3297	75	46.2963
375	86.4865	45.1219	62.069	43.8095	47.8261	70.3297	72.0588	51.8518
377.5	87.8378	46.3415	60.3448	43.8095	52.1739	71.4286	72.0588	50
380	87.8378	46.3415	63.7931	40.9524	52.1739	70.3297	76.4706	50
382.5	85.1351	41.4634	60.3448	41.9048	53.6232	71.4286	66.1765	50
385	83.7838	46.3415	56.8965	44.7619	55.0725	70.3297	67.6471	46.2963
387.5	83.7838	45.1219	56.8965	39.0476	55.0725	65.9341	69.1176	48.1482
390	82.4324	46.3415	60.3448	40.9524	52.1739	67.033	69.1176	50
392.5	81.0811	47.561	56.8965	40.9524	53.6232	65.9341	70.5882	48.1482
395	81.0811	42.6829	60.3448	46.6667	56.5217	62.6374	69.1176	44.4444
397.5	83.7838	42.6829	56.8965	40	55.0725	60.4396	67.6471	44.4444
400	82.4324	42.6829	62.069	40.9524	57.971	60.4396	66.1765	42.5926
402.5	81.0811	43.9024	60.3448	41.9048	56.5217	61.5385	64.7059	44.4444
405	77.027	42.6829	56.8965	43.8095	59.4203	61.5385	66.1765	44.4444
407.5	72.973	45.1219	58.6207	42.8571	60.8696	62.6374	67.6471	42.5926
410	74.3243	46.3415	58.6207	44.7619	57.971	61.5385	67.6471	42.5926
412.5	74.3243	42.6829	62.069	45.7143	57.971	62.6374	69.1176	42.5926
415	79.7297	42.6829	58.6207	44.7619	56.5217	58.2418	67.6471	42.5926
417.5	78.3784	41.4634	56.8965	40.9524	56.5217	56.044	61.7647	38.8889
420	79.7297	40.2439	63.7931	42.8571	57.971	59.3407	63.2353	44.4444
422.5	75.6757	41.4634	51.7241	41.9048	55.0725	59.3407	63.2353	44.4444
425	75.6757	42.6829	56.8965	43.8095	56.5217	61.5385	66.1765	46.2963
427.5	77.027	41.4634	53.4483	46.6667	56.5217	59.3407	60.2941	48.1482
430	78.3784	45.1219	55.1724	38.0952	55.0725	57.1429	58.8235	48.1482
432.5	75.6757	42.6829	53.4483	41.9048	57.971	60.4396	58.8235	42.5926
435	72.973	41.4634	56.8965	38.0952	55.0725	57.1429	63.2353	48.1482
437.5	74.3243	41.4634	55.1724	40.9524	53.6232	56.044	61.7647	46.2963
440	77.027	42.6829	50	40.9524	53.6232	57.1429	63.2353	50
442.5	77.027	42.6829	51.7241	41.9048	50.7246	61.5385	64.7059	48.1482
445	77.027	40.2439	56.8965	39.0476	53.6232	60.4396	60.2941	48.1482
447.5	77.027	43.9024	51.7241	40	53.6232	59.3407	63.2353	42.5926
450	70.2703	42.6829	53.4483	40	50.7246	57.1429	63.2353	44.4444
452.5	72.973	40.2439	50	35.2381	52.1739	62.6374	58.8235	48.1482
455	74.3243	42.6829	53.4483	40.9524	53.6232	58.2418	60.2941	42.5926
457.5	77.027	41.4634	53.4483	37.1429	50.7246	54.9451	60.2941	42.5926
460	71.6216	40.2439	50	38.0952	53.6232	56.044	60.2941	44.4444
462.5	75.6757	42.6829	55.1724	37.1429	50.7246	54.9451	57.3529	42.5926
465	77.027	37.8049	51.7241	36.1905	50.7246	57.1429	58.8235	42.5926
467.5	72.973	41.4634	46.5517	38.0952	50.7246	57.1429	61.7647	42.5926
470	72.973	39.0244	55.1724	35.2381	46.3768	56.044	63.2353	44.4444
472.5	75.6757	40.2439	44.8276	33.3333	43.4783	56.044	63.2353	40.7407
475	75.6757	36.5854	48.2759	37.1429	44.9275	54.9451	58.8235	40.7407
477.5	74.3243	37.8049	46.5517	40	46.3768	51.6484	60.2941	44.4444
480	77.027	37.8049	50	33.3333	44.9275	53.8462	60.2941	46.2963
