# Supplementary material for: Spreading of a mycobacterial cell-surface lipid into host epithelial membranes promotes infectivity
Source: eLife. 2020 Nov 23;9:e60648. doi: 10.7554/eLife.60648 (PMC7735756; doi:10.7554/eLife.60648)
Supplement: Figure 4—source data 1. [file elife-60648-fig4-data1.xlsx]

## Sheet: Figure 4E
2hpi			4hpi			6hpi			12hpi
% spread in Epithelia	% spread in macrophages	total % spread	% spread in Epithelia	% spread in macrophages	total % spread	% spread in Epithelia	% spread in macrophages	total % spread	% spread in Epithelia	% spread in macrophages	total % spread
11.7437	3.49211	15.2358	11.4221	9.57567	20.9977	14.9464	13.9892	28.9356	15.2611	30.2716	45.5327
8.36889	0	8.36889	9.29197	0	9.29197	11.3898	6.62427	18.0141	8.31594	32.7819	41.0978
12.3234	0	12.3234	10.4077	4.00094	14.4086	10.952	11.9685	22.9205	19.1295	26.0278	45.1572
11.9197	0	11.9197	9.48977	0.117245	9.60702	10.3302	9.47876	19.809	11.0726	37.6628	48.7354
14.7106	2.22819	16.9387	12.1147	14.8485	26.9631	5.35666	21.5006	26.8573	6.87975	36.2652	43.1449
9.2993	0.336846	9.63614	9.00801	5.52961	14.5376	11.0891	13.2577	24.3467	10	29.8846	39.8846
24.4981	0.086146	24.5842	12.9752	10.7114	23.6866	12.3696	16.5074	28.877	8.60724	22.7533	31.3605

## Sheet: Figure 4F
lipoPBS 0dpi	lipoCLOD 0dpi	lipoPBS 1dpi	lipoCLOD 1dpi
4.42281	1.19423	14.2848	24.1594
2.63775	0.804114	20.4964	13.0924
2.18175	2.12379	21.4336	15.198
4.66659	0.913395	24.2887	39.2866
0.961123	1.53308	14.2108	18.9642
2.96942	2.34896	25.5258	26.5106
1.10022	1.59614	27.3833	41.4714
4.72358	1.10597	19.6421	22.4274
1.7952	1.39945	26.5543	12.967
1.35021	1.74237	14.245	26.8889
1.30197	0.986323	21.9986	9.28375
2.60286	1.79353	12.7765	18.6364
1.1838	1.48155	31.1253	40.8456
1.0048	6.18593	32.3457	19.4725
	2.06447	26.5256
