# Supplementary material for: Spreading of a mycobacterial cell-surface lipid into host epithelial membranes promotes infectivity
Source: eLife. 2020 Nov 23;9:e60648. doi: 10.7554/eLife.60648 (PMC7735756; doi:10.7554/eLife.60648)
Supplement: Figure 5—source data 1. [file elife-60648-fig5-data1.xlsx]

## Sheet: Figure 5B
	DIM-488 01			DIM-488 02			DIM-488 03			DIM-488 04			DIM-488 05			DIM-488 06			DIM-488 07			DIM-488 08			DIM-488 09			DIM-488 10			TMM-488 001			TMM-488 002			TMM-488 003			TMM-488 004			TMM-488 005			TMM-488 006			TMM-488 007
Time (sec)	intensity whole	intensity bleach	normalized intensity	intensity whole	intensity bleach	normalized intensity	intensity whole	intensity bleach	normalized intensity	intensity whole	intensity bleach	normalized intensity	intensity whole	intensity bleach	normalized intensity	intensity whole	intensity bleach	normalized intensity	intensity whole	intensity bleach	normalized intensity	intensity whole	intensity bleach	normalized intensity	intensity whole	intensity bleach	normalized intensity	intensity whole	intensity bleach	normalized intensity	intensity whole	intensity bleach	normalized intensity	intensity whole	intensity bleach	normalized intensity	intensity whole	intensity bleach	normalized intensity	intensity whole	intensity bleach	normalized intensity	intensity whole	intensity bleach	normalized intensity	intensity whole	intensity bleach	normalized intensity	intensity whole
0	992.2	0	0	1261.46	0	0	1060.12	0	0	1057.29	0	0	717.73	0	0	1317.02	0	0	939.98	0	0	1126.7	0	0	884.07	0	0	1105.46	0	0	514.03	0	0	897.36	0	0	1302.64	0	0	583.6	0	0	622.96	0	0	327.25	0	0	939.35
0.976	1029.08	135.43	0.131603	1274.54	54.03	0.0423918	1095.99	188.1	0.171626	1114.86	126.86	0.11379	720.39	98.3	0.136454	1334.66	220.27	0.165038	991.28	380.92	0.384271	1144.15	297.13	0.259695	941.02	325.5	0.345901	1150.14	251.45	0.218626	506.81	12.76	0.0251771	888.03	11.2	0.0126122	1278.2	26.19	0.0204898	591.71	16.52	0.0279191	625.4	8.42	0.0134634	323.85	0.91	0.00280994	922.86
1.951	1068.53	273.38	0.255847	1300.53	128.65	0.0989212	1131	375.03	0.331592	1149.44	227.82	0.198201	719.97	179.69	0.24958	1370.59	400.55	0.292246	1026.39	619.58	0.60365	1170.11	501.85	0.428891	970.83	556.15	0.57286	1178.74	460.2	0.390417	502.46	23.43	0.0466306	875.44	23.19	0.0264895	1272.76	46.04	0.0361734	565.01	21.2	0.0375215	618.59	14.53	0.0234889	327.55	7.28	0.0222256	932.26
2.927	1092.23	388.95	0.356106	1325.26	208.84	0.157584	1143.18	521.54	0.456219	1186.7	332.07	0.279826	721.48	266.37	0.369199	1357.67	513.5	0.378222	1020.22	773.52	0.758189	1183.89	556.55	0.470103	991.71	706.5	0.712406	1182.86	593.48	0.501733	499.2	28.56	0.0572115	868.8	18.35	0.0211211	1264.94	43.55	0.0344285	547.81	23.34	0.042606	616.26	20.96	0.0340116	326.19	8.05	0.0246789	925.13
3.903	1109.51	477.84	0.430677	1321.97	256.56	0.194074	1164.78	637.12	0.546987	1203.76	432.99	0.359698	714.86	310.58	0.434463	1343.5	628.36	0.467704	1003.87	878.59	0.875203	1187.75	641.06	0.539726	996.32	786.92	0.789827	1215	703.05	0.578642	489.17	34.58	0.0706912	854.79	22.07	0.0258192	1263.13	48.33	0.0382621	537.01	28.18	0.0524757	600.16	16.14	0.0268928	317.06	11.5	0.0362707	933.68
4.879	1107.34	575.52	0.519732	1351.67	320.72	0.237277	1170.15	729.67	0.62357	1203.51	500.58	0.415933	701.25	366.82	0.523094	1359.31	750.68	0.552251	915.08	955.88	1.04459	1195.51	686.89	0.574558	1009.6	875.77	0.867443	1229.41	790.46	0.642959	486.76	31.79	0.0653094	851.77	25.69	0.0301607	1247.98	67.48	0.0540714	531.89	34.85	0.0655211	589.7	20.75	0.0351874	309.18	10.62	0.0343489	910.9
5.854	1119.01	667.86	0.596831	1355.92	402.1	0.296551	1181.26	820.37	0.694487	1231.96	589.51	0.478514	682.72	386.54	0.566176	1359.99	789.39	0.580438	897.32	960.44	1.07034	1189.95	742.05	0.623598	1014.13	908.72	0.896059	1233.94	879.86	0.713049	481.51	37.53	0.0779423	837.79	30.37	0.0362501	1248.04	66.33	0.0531473	538.24	44.86	0.0833457	593.89	19.68	0.0331374	306.98	14.47	0.0471366	878.73
6.83	1109.6	704.51	0.634922	1370.97	449.26	0.327695	1159.17	888.72	0.766687	1262.33	639.89	0.506912	697.81	444.1	0.63642	1351.27	856.67	0.633974	905.4	970.54	1.07195	1175.56	760.57	0.646985	1002.16	940.55	0.938523	1245.17	933.24	0.749488	473.19	45.21	0.095543	829.96	27.67	0.033339	1240.52	62.74	0.0505756	530.25	40.23	0.0758699	591.57	19.74	0.0333688	296.87	15.08	0.0507966	891.45
7.806	1112.39	739.09	0.664416	1376.88	505.32	0.367004	1151.99	921.43	0.799859	1271.42	683.63	0.53769	702.64	466.66	0.664152	1344.27	927	0.689594	933.63	1017.62	1.08996	1154.43	781.18	0.67668	996.15	983.15	0.98695	1252.17	982	0.784239	465.46	43.79	0.094079	817.68	26.91	0.0329102	1206.33	65.92	0.0546451	514.84	52.62	0.102207	577.58	25.56	0.0442536	292.45	12.81	0.0438024	862.67
8.805	1111.82	808.8	0.727456	1384.96	551.03	0.397867	1181.79	1000.98	0.847003	1283.68	750.35	0.58453	711.05	504.62	0.709683	1354.49	949.14	0.700736	896.21	996.46	1.11186	1121.05	750.17	0.669167	980.73	986.97	1.00636	1253.48	1014.36	0.809235	457.89	43.54	0.0950883	784.84	19.81	0.0252408	1208.29	78.13	0.0646616	512.73	58.19	0.113491	585.31	21.86	0.0373477	299.73	21.91	0.0730991	881.3
9.78	1124.47	837.43	0.744733	1375.95	592.03	0.43027	1175.03	1031.8	0.878105	1304.46	784.76	0.601598	730.07	539.84	0.739436	1344.75	1022.01	0.76	866.42	981.43	1.13274	1137.74	842.71	0.740688	998.55	986.31	0.987742	1241.82	1047.97	0.843898	454.24	52.76	0.11615	784.29	31.65	0.040355	1230.65	78.58	0.0638524	507.75	63.76	0.125574	576.77	22.53	0.0390624	293.18	21.41	0.0730268	867.46
10.756	1140.29	881.03	0.772637	1397.37	656.76	0.469997	1169.24	1054.14	0.90156	1319.62	804.64	0.609751	735.61	574.85	0.78146	1335.81	1077.88	0.806911	892.79	1041.61	1.16669	1150.82	807.2	0.701413	1002.14	975.15	0.973068	1243.66	1079.43	0.867946	448.01	57.87	0.129171	767.37	29.56	0.0385212	1201.37	90.18	0.0750643	497.49	63.35	0.127339	566.53	29.78	0.0525656	289.44	22.58	0.0780127	860.36
11.732	1087.71	853.82	0.78497	1383.85	668.78	0.483275	1190.59	1078.32	0.905702	1321.86	857.78	0.648919	713.39	598.95	0.839583	1333.79	1087.99	0.815713	892.46	1020.09	1.14301	1143.16	815.41	0.713295	1002.28	995.54	0.993275	1239.4	1105.47	0.89194	439.84	55.43	0.126023	748.71	25.86	0.0345394	1180.91	91.81	0.0777451	491.18	64.62	0.131561	550.4	30.32	0.0550872	287.87	19.36	0.0672526	860.44
12.708	1121.94	893.94	0.796781	1377.46	710.54	0.515833	1175.56	1089.93	0.927158	1337.99	854.42	0.638585	726.17	620.9	0.855034	1301.53	1079.86	0.829685	918.24	1023.84	1.115	1152.67	816.84	0.70865	993.35	1014.87	1.02166	1249.9	1144.16	0.915401	435.99	59.66	0.136838	750.81	33.33	0.0443921	1190.68	99.54	0.0835993	477.31	70.31	0.147305	546.11	25.69	0.0470418	283.5	20.77	0.0732628	852.17
13.683	1129.09	887.65	0.786164	1397.78	742.33	0.531078	1178.29	1110.43	0.942408	1323.55	905.66	0.684266	725.49	625.02	0.861514	1294.64	1082.05	0.835792	915.95	1012.43	1.10533	1164.81	833.88	0.715894	991.77	1014.58	1.023	1228.83	1157.8	0.942197	430.41	64.82	0.150601	754.83	33.59	0.0445001	1157.74	96.33	0.0832052	482.74	77.68	0.160915	549.37	34.44	0.06269	275.49	28.29	0.10269	844.42
14.659	1113.91	900.17	0.808117	1381.33	764.98	0.5538	1159.82	1138.2	0.981359	1332.53	923.44	0.692998	735.06	636.14	0.865426	1286.08	1098.98	0.854519	901.4	1013.92	1.12483	1153.86	853.14	0.739379	985.27	1031.12	1.04654	1232.73	1166.88	0.946582	428.36	72.59	0.16946	743.11	28.92	0.0389175	1144.11	93.24	0.0814957	468.92	76.79	0.163759	549.08	30.1	0.054819	277.83	27.61	0.0993773	820.91
15.635	1120.09	916.23	0.817997	1365.8	782.78	0.573129	1158.46	1129.65	0.975131	1322.89	944.19	0.713733	734.92	653.85	0.889689	1279.12	1123.45	0.878299	886.43	1008	1.13715	1148.14	807.24	0.703085	964.79	1069.01	1.10802	1235.36	1163.8	0.942074	418.2	69.54	0.166284	734.5	33.95	0.0462219	1157.78	100.18	0.0865277	468.14	77.1	0.164694	518.38	32.58	0.0628496	262.06	28.44	0.108525	818.14
16.611	1125.22	950.06	0.844333	1386.26	825.48	0.595473	1172.87	1134.26	0.967081	1314.55	983.38	0.748073	736.92	661.58	0.897764	1259.53	1109.99	0.881273	874.47	996.78	1.13987	1145.2	820.91	0.716827	950.36	1061.06	1.11648	1217.52	1162.76	0.955023	413.4	73.35	0.177431	722.43	38.45	0.0532231	1139.48	103.01	0.0904009	460.14	87.42	0.189986	527.31	32.19	0.0610457	269.41	28.25	0.104859	815.29
17.586	1103.05	960.35	0.870631	1414.92	845.7	0.597702	1155.34	1138.42	0.985355	1311.19	981.44	0.748511	734.91	666.35	0.90671	1241.67	1116.44	0.899144	867.39	977.61	1.12707	1134.41	830.87	0.732425	974.11	1051.48	1.07943	1228.88	1196.23	0.973431	405.38	70.96	0.175046	725.63	34.88	0.0480686	1119.69	102.97	0.091963	470.72	93.34	0.198292	516.13	28.68	0.0555674	268.09	22.06	0.0822858	802.03
18.547	1100.42	957.47	0.870095	1412.14	873.61	0.618643	1150.16	1152.13	1.00171	1330.31	984.64	0.740158	736.65	669.91	0.909401	1222.45	1117.77	0.914369	873.95	951.02	1.08819	1124.72	841.45	0.748142	966.81	1023.86	1.05901	1219.29	1172.11	0.961305	400.48	70.34	0.175639	695.77	30.22	0.0434339	1129.48	94.79	0.0839236	455.66	89.5	0.196418	501.73	30.11	0.0600124	260.91	28.23	0.108198	788.35
19.523	1101.68	951.24	0.863445	1405.76	877.99	0.624566	1143.27	1153	1.00851	1353.47	1031.28	0.761953	723.57	676.1	0.934395	1211.55	1101.61	0.909257	864.74	933.12	1.07908	1121.28	831.99	0.742	966.64	1025.41	1.0608	1217.76	1206.82	0.991016	396.84	73.46	0.185112	694.34	37.43	0.0539073	1120.23	114.02	0.101783	446.7	97.4	0.218043	492.91	29.76	0.0603761	259.07	31.22	0.120508	801.18
20.499	1107.29	963.27	0.869935	1402.72	884.28	0.630404	1147.38	1169.63	1.01939	1351.5	1027.86	0.760533	689.52	664.05	0.963061	1197.72	1115.28	0.931169	847.1	929.79	1.09762	1118.73	794.91	0.710547	959.92	1021.16	1.0638	1212.28	1208.38	0.996783	392.28	77.69	0.198047	687.77	41.17	0.0598601	1104.41	107.6	0.0974276	422.36	94.06	0.222701	493.95	30.41	0.0615649	248.89	27.58	0.110812	775.29
21.475	1088.98	974.18	0.89458	1401.06	907.56	0.647767	1128.27	1170.75	1.03765	1349.93	1023.06	0.757862	705.7	688.67	0.975868	1175.5	1101.78	0.937286	841.6	934	1.10979	1095.55	817.12	0.745854	958.96	994.19	1.03674	1215.43	1227.46	1.0099	384.44	80.11	0.208381	677.33	37.6	0.0555121	1096.48	106.56	0.0971837	434.78	97.16	0.223469	478.53	28.82	0.0602261	241.83	27.44	0.113468	780.18
22.45	1084.94	974.79	0.898474	1405.39	907.79	0.645935	1131.55	1166.05	1.03049	1343.66	1022.21	0.760765	711.03	708.82	0.996892	1181.47	1075.64	0.910425	827.18	919.09	1.11111	1101.28	799.67	0.726128	949.8	1029.68	1.0841	1193.83	1234.05	1.03369	379.42	75.65	0.199383	666.1	44.7	0.067107	1092.56	118.37	0.108342	425.59	102.82	0.241594	476.12	27.67	0.0581156	246.05	28.38	0.115342	773.94
23.426	1079.5	968.58	0.897249	1395.43	921.74	0.660542	1117.82	1148.12	1.02711	1312.63	1013.06	0.771779	719.73	696.31	0.96746	1179.43	1120.58	0.950103	821.27	883.26	1.07548	1084.79	829.16	0.764351	945.73	981.95	1.0383	1185.52	1247.56	1.05233	367.83	78.2	0.212598	661.32	40.11	0.0606514	1078.83	104.24	0.0966232	433.4	102.87	0.237356	475.64	33.91	0.0712934	242.24	28.79	0.118849	773.48
24.402	1083.53	999.97	0.922882	1388.44	943.91	0.679835	1116.19	1160.29	1.03951	1317.76	1043.37	0.791775	704.89	690.57	0.979685	1181.93	1110.56	0.939616	804.28	853.48	1.06117	1084.35	812.45	0.749251	948.84	1005.21	1.05941	1194.88	1229.2	1.02872	367.91	83.98	0.228262	652.36	36.38	0.0557668	1065.84	106.61	0.100024	425.83	98.58	0.231501	454.41	32.86	0.0723135	236.21	30.84	0.130562	775.71
25.378	1087.44	1008.03	0.926975	1363.97	932.64	0.683769	1099.14	1138.82	1.0361	1288.93	1052.96	0.816926	703.48	704.82	1.0019	1168.38	1095.73	0.93782	801.32	881.3	1.09981	1061.44	818.25	0.770887	928.35	970.38	1.04527	1196.96	1257.5	1.05058	362.28	84.14	0.232251	640.62	38.21	0.0596453	1075.04	108.28	0.100722	427.22	99.33	0.232503	458.62	31.65	0.0690114	236.97	28.7	0.121112	765.04
26.353	1069.61	973.32	0.909977	1374.74	975.37	0.709494	1086.96	1120.81	1.03114	1318.88	1035.99	0.785507	700.8	693.78	0.989983	1134.56	1076.75	0.949046	789.58	835.92	1.05869	1010.58	746.06	0.738249	944.33	976.67	1.03425	1172.14	1230.36	1.04967	356.2	84.98	0.238574	634.54	38.49	0.0606581	1069.2	109.49	0.102404	405.48	97.84	0.241294	461.45	32.89	0.0712753	230.2	34.35	0.149218	748.33
27.329	1047.03	963.18	0.919916	1369.75	962.66	0.7028	1035.86	1089.68	1.05196	1327.74	1066.87	0.803523	697.62	708.49	1.01558	1093.03	1048.3	0.959077	777.56	854.92	1.09949	993.58	744.3	0.749109	924.99	941.16	1.01748	1173.25	1255.53	1.07013	352.3	85.4	0.242407	620.7	37.18	0.0599001	1066.61	106.2	0.0995678	395.3	105.99	0.268125	446.19	27.03	0.0605796	228.52	36.29	0.158804	735.04
28.305	1060.35	985.43	0.929344	1327.54	968.1	0.729244	943.18	999.18	1.05937	1329.58	1079.02	0.81155	686.61	698.68	1.01758	1088.59	1044.79	0.959764	766.29	829.04	1.08189	942.4	700.75	0.74358	927	961.34	1.03704	1167.77	1239.53	1.06145	348.11	92.15	0.264715	614.79	44.44	0.0722848	1070.98	113	0.105511	393.59	112.99	0.287075	438.96	30.61	0.069733	225.72	38.07	0.16866	749.02
[truncated: 11 more columns]

## Sheet: Figure 5C
DIM-488	TMM-488
0.9162	0.5099
0.7909	0.09254
1.041	0.1121
0.8117	0.5171
1.02	0.07262
0.9583	0.3018
1.113	0.4356
0.7348	0.6636
1.049	0.2903
1.034

## Sheet: Figure 5D
DIM-488 2hpi			TMM-488 2hpi			DIM-488 24hpi			TMM-488 24hpi
% spread in Epithelia	% spread in macrophages	total % spread	% spread in Epithelia	% spread in macrophages	total % spread	% spread in Epithelia	% spread in macrophages	total % spread	% spread in Epithelia	% spread in macrophages	total % spread
6.71701	0.289787	7.0068	0.348413	1.08838	1.43679	9.60174	28.3355	37.9372	0	58.2707	58.2707
30.8123	0	30.8123	4.78362	1.81174	6.59536	34.046	32.142	66.188	3	30.1199	33.1199
12.1143	4.51861	16.6329	11.0112	2.24233	13.2535	22.3352	41.6857	64.0209	40.7219	31.8933	72.6153
12.3793	12.7226	25.1019	0.633201	0	0.633201	11.6271	21.6475	33.2747	10	23.9204	33.9204
19.656	0	19.656	0.146894	0	0.146894	13.6568	25.2568	38.9135	0.20365	48.3308	48.5344
23.5517	0	23.5517	0.11773	0	0.11773	0	31.0559	31.0559	26.3549	63.0917	89.4466
31.3343	14.1033	45.4376	12.4923	2.08544	14.5777	15.4427	42.4119	57.8546	0.2222	55	55.2222
29.2828	1.64074	30.9235	3.68972	0	3.68972	5.20042	48.6705	53.8709	0.02774	30	30.0277
33.4271	1.15034	34.5774	0.111387	0.777165	0.888552	15.8394	36.2404	52.0798	1.05391	54.8915	55.9454
14.0009	0	14.0009	0	0	0	8.18103	27.5237	35.7047	3.2917	26.9093	30.201
11.2021	1.87976	13.0819	0	1.13011	1.13011	16.7784	41.005	57.7834	16.2363	40.3699	56.6062
13.8902	0	13.8902	0	0.0812553	0.0812553	17.8053	75.1521	92.9574	0	45.0434	45.0434
11.7939	0	11.7939	0	0	0	16.4255	22.1404	38.5659	0	49.5568	49.5568
32.6878	0	32.6878	6.01584	0	6.01584	14.42	33.9375	48.3576	1.12445	26.3004	27.4248
12.4377	8.71908	21.1567	1.31034	0.261553	1.57189	4.10919	21.8899	25.9991
34.8298	0.448564	35.2784	3.18949	0	3.18949	8.47673	31.1448	39.6215
23.5224	0.0386872	23.5611				7.08397	45.5221	52.606
27.0658	2.1316	29.1974				4.85806	36.2871	41.1451
10.4133	1.33303	11.7463

## Sheet: Figure 5E
lipoPBS DIM-488	lipoCLOD DIM-488	lipoPBS TMM-488	lipoCLOD TMM-488
25.9979	36.8178	14.7435	0.13891
19.043	24.4321	21.3184	2.28886
27.6817	14.1473	23.6456	0.00294701
31.4415	27.4621	17.144	5.53158
14.9479	22.063	14.2672	0.9332
17.5665	20.2995	12.095	0.869686
29.3887	15.4083	21.0594	4.12237
29.0042	13.6848	31.0534	5.23877
24.8326	13.9508	14.0736	0.0605372
17.7452	15.4877	15.2642	0.0297904
		21.864	0.871549

## Sheet: Figure 5F
	Live 01			Live 02			Live 03			Live 04			Live 05			Live 06			Live 07			live 08			live 09			live 10			live 11			live 12			live 13			live 14			live 15			heat-killed 01			heat-killed 02
Time	Intensity whole	Intensity bleach	normalized intensity	Intensity whole	Intensity bleach	normalized intensity	Intensity whole	Intensity bleach	normalized intensity	Intensity whole	Intensity bleach	normalized intensity	Intensity whole	Intensity bleach	normalized intensity	Intensity whole	Intensity bleach	normalized intensity	Intensity whole	Intensity bleach	normalized intensity	Intensity whole	Intensity bleach	normalized intensity	Intensity whole	Intensity bleach	normalized intensity	Intensity whole	Intensity bleach	normalized intensity	Intensity whole	Intensity bleach	normalized intensity	Intensity whole	Intensity bleach	normalized intensity	Intensity whole	Intensity bleach	normalized intensity	Intensity whole	Intensity bleach	normalized intensity	Intensity whole	Intensity bleach	normalized intensity	Intensity whole	Intensity bleach	normalized intensity	Intensity whole
0	890.14	0	0	944.33	0	0	1619.07	0	0	1211.67	0	0	1039.41	0	0	1277.35	0	0	1192.72	0	0	841.71	0	0	1185.21	0	0	1154.08	0	0	1415.7	0	0	1046.27	0	0	1066.77	0	0	1091.59	0	0	626.96	0	0	535.95	0	0	961.17
0.976	926.64	119.98	0.129479	973.76	155.28	0.159464	1631.67	224.23	0.137424	1225.92	80.08	0.0653224	1081.01	220.52	0.203994	1367.27	335.02	0.245028	1225.56	164.56	0.134273	864	93.29	0.107975	1206.73	261.64	0.216817	1179.86	139.71	0.118412	1473.07	122.02	0.0828338	1055.07	255.29	0.241965	1084.42	134.49	0.12402	1116.97	212.13	0.189916	625.76	105.29	0.168259	551.5	56.09	0.101704	997.25
1.951	941.64	222.86	0.236672	993.06	291.53	0.293567	1636.13	397.59	0.243006	1241.93	147.34	0.118638	1136.55	381.88	0.335999	1415.94	624.54	0.441078	1272.44	289.12	0.227217	882.47	176.96	0.200528	1215.3	444.28	0.365572	1201.49	267.73	0.222832	1493.61	230.8	0.154525	1038.07	411.76	0.396659	1092.62	242.49	0.221934	1120.28	381.87	0.34087	611.17	186.55	0.305234	566.31	93.82	0.165669	1015.8
2.927	958.66	314.58	0.328146	1008.74	379.17	0.375885	1652.16	515.22	0.311846	1254.28	231.93	0.184911	1157.65	512.19	0.442439	1450.13	844.5	0.582362	1290.26	389.48	0.301862	891.02	271.61	0.30483	1214.06	582.01	0.479391	1208.11	367.28	0.304012	1499.91	338.16	0.225454	1026.85	532.34	0.51842	1105.7	358.16	0.323921	1109.92	494.36	0.445401	593.13	236.67	0.399019	574.07	131.88	0.229728	1033.18
3.903	980.3	390.39	0.398235	1011.86	456.99	0.451634	1637.53	636.7	0.388817	1266.94	290.43	0.229237	1181.28	633.75	0.536494	1481.39	996.76	0.672855	1305.12	455.24	0.348811	913.19	354.42	0.388112	1216.62	678.24	0.557479	1213.69	461.38	0.380146	1520.39	416.6	0.274009	1006.45	595.23	0.591415	1110.29	439.09	0.395473	1105.22	590.18	0.533993	579.78	284.84	0.49129	572.09	170.25	0.297593	1052.3
4.879	982.68	467.56	0.475801	1014.08	513.54	0.50641	1643.39	689.81	0.419748	1273.38	350.79	0.275479	1205.72	718.67	0.59605	1488.23	1119.77	0.752417	1331.36	526.85	0.395723	923.4	407.17	0.440947	1202.49	738.09	0.613801	1228.05	549.31	0.447303	1552.89	507.55	0.326842	989.75	655.34	0.662127	1098.67	508.67	0.462987	1090.28	637.55	0.584758	557.37	303.09	0.543786	583.63	202.29	0.346607	1049.14
5.855	988.93	518.3	0.524102	1026.16	565.71	0.551288	1653.42	785.73	0.475215	1286.77	407.53	0.316708	1206.01	792.01	0.656719	1513.46	1178.79	0.778871	1342.3	580.19	0.432236	923.66	458.57	0.496471	1207.61	819.15	0.678323	1222.25	607.4	0.496952	1557.26	576.54	0.370227	964.5	676.2	0.701089	1105.43	558.57	0.505297	1062.32	693.59	0.652901	535.67	319.95	0.597289	589.68	235.36	0.399132	1070.23
6.83	999.8	575.52	0.575635	1020.51	608.3	0.596075	1642.3	849.35	0.517171	1295.31	458.27	0.353792	1227.87	867.17	0.706239	1511.49	1234.67	0.816856	1351.41	627.66	0.464448	941.94	521.28	0.553411	1207.5	845.51	0.700215	1221.47	678.31	0.555323	1568.73	628	0.400324	945.44	705.45	0.746161	1101.5	618.51	0.561516	1045.93	733.29	0.701089	514.61	335.99	0.652902	601.55	252.23	0.4193	1054.59
7.806	997.11	610.15	0.611918	1025.91	643.1	0.626858	1641.68	899.76	0.548073	1298.36	495.4	0.381558	1234.75	898.24	0.727467	1518.09	1279.9	0.843099	1366.3	686.58	0.50251	941.56	565.79	0.600907	1188.82	894.33	0.752284	1212.87	735.6	0.606495	1572.86	682.48	0.43391	924.65	706.8	0.764397	1091.57	661.23	0.605761	1026.64	743.9	0.724597	493.04	340.62	0.690857	606.09	261.85	0.432032	1066.9
8.805	996.13	642.82	0.645317	1024.75	675.99	0.659663	1628.76	931.37	0.571828	1307.23	554.4	0.424103	1229.9	952.72	0.774632	1530.76	1329.38	0.868444	1377.78	717.85	0.521019	948.21	584.21	0.616119	1191.73	930.72	0.780982	1215.47	783.25	0.644401	1583.79	718.11	0.453412	905.35	730.43	0.806793	1081.06	689.5	0.6378	1018.17	786.33	0.772297	478.9	338.78	0.707413	610.27	298.88	0.48975	1064.21
9.781	1007.8	699.32	0.693908	1032.12	732.35	0.709559	1645.18	993.04	0.603606	1322.06	584.91	0.442423	1224.86	962.65	0.785927	1517.87	1364.75	0.899122	1388.03	770.43	0.555053	947.7	620.36	0.654595	1194.19	992.66	0.831241	1222.39	841.39	0.688316	1595	768.33	0.481712	884.44	736.35	0.832561	1068.09	709.56	0.664326	996.02	791.19	0.794352	457.36	346.06	0.756647	610.86	309.08	0.505975	1067.16
10.756	1002.33	708.37	0.706723	1028.7	748.77	0.72788	1640.01	1016.76	0.619972	1316.26	609.69	0.463199	1245.3	1007.7	0.809203	1524.82	1362.48	0.893535	1384.21	767.32	0.554338	963.79	664.06	0.689009	1186.93	998.12	0.840926	1218.78	865.65	0.710259	1601.28	810.12	0.50592	864.29	746.9	0.864178	1066.77	738.35	0.692136	970.8	792.72	0.816564	446.35	357.37	0.80065	613.07	328.32	0.535534	1068
11.732	1004.2	729.3	0.72625	1029.01	771.76	0.750002	1628.63	1040.06	0.63861	1321.82	652.93	0.493963	1247.09	1026.94	0.823469	1545.64	1453.06	0.940102	1400.84	804.48	0.574284	963	704.16	0.731215	1165.96	990.72	0.849703	1209.26	906.56	0.749682	1589.65	848.91	0.534023	841.59	747.62	0.888342	1060.23	777.35	0.73319	958.17	783.35	0.817548	429.01	354.56	0.826461	626.12	347.12	0.554399	1077.62
12.708	1003.81	768.95	0.766031	1024.14	802.15	0.783243	1632.27	1062.48	0.650922	1323.17	676.15	0.511008	1249.13	1059.02	0.847806	1540.76	1476.89	0.958546	1405.76	813.11	0.578413	972.34	721.14	0.741654	1167.99	1033.38	0.884751	1195.48	912.53	0.763317	1596.18	882.8	0.55307	823.58	734.84	0.892251	1039.64	771.21	0.741805	937.74	824.47	0.87921	412.56	346.55	0.839999	616.76	346.77	0.562245	1072.52
13.684	1000.36	793.5	0.793214	1024.68	829.59	0.809609	1619.71	1085.18	0.669984	1327.58	734.26	0.553082	1258.34	1062.13	0.844072	1551.35	1471.57	0.948574	1410.81	869.08	0.616015	977.77	734.29	0.750984	1165.66	1065.08	0.913714	1201.19	943.45	0.785429	1603.16	890.82	0.555665	798.97	714.9	0.894777	1029.11	781.12	0.759025	921.7	811.94	0.880916	398.26	342.69	0.860468	621.41	361.38	0.581548	1062.74
14.659	1012.99	840.5	0.829722	1033.88	858.05	0.829932	1618.62	1121.35	0.692782	1332.85	734.85	0.551337	1246.82	1083.94	0.869364	1535.89	1445.36	0.941057	1413.49	866.02	0.612682	983.86	767.78	0.780375	1155.25	1043.44	0.903216	1191.98	961.16	0.806356	1599.61	920.64	0.57554	777.83	693.91	0.89211	1006.72	783.53	0.7783	881.91	768.91	0.871869	384.47	344.23	0.895336	624.67	375.07	0.600429	1055.32
15.635	1006.97	843.56	0.837721	1028.06	854.75	0.83142	1606.98	1113.65	0.693008	1327.12	753.93	0.568095	1259.85	1126.08	0.893821	1541.41	1498.08	0.971889	1421.48	885.18	0.622717	985.04	773.52	0.785268	1143.8	1062.08	0.928554	1184.78	988.44	0.834281	1610.24	963.22	0.598184	757.51	687.83	0.908014	998.25	794.28	0.795672	875.94	790.04	0.901934	374.68	338.2	0.902637	631.84	390.03	0.617292	1055.29
16.611	1009.16	849.54	0.841829	1028.13	841.39	0.818369	1619.32	1159.31	0.715924	1337.08	804.94	0.602013	1267.78	1115.25	0.879687	1551.35	1509.75	0.973185	1406.38	903.44	0.642387	990	808.46	0.816626	1144.08	1042.04	0.91081	1179.22	1006.3	0.853361	1613.81	981.75	0.608343	744.94	695.95	0.934236	979.03	791.12	0.808065	854.7	777.81	0.910039	363.15	318.32	0.876552	629.22	396.14	0.629573	1050.69
17.587	1007.22	872.72	0.866464	1018.66	879.91	0.863792	1606.41	1143.15	0.711618	1345.78	803.41	0.596985	1255.25	1138.25	0.906791	1564.13	1545.82	0.988294	1417.52	912.63	0.643822	986.33	808.66	0.819868	1134.62	1072.65	0.945383	1181.05	1034.71	0.876093	1598.24	1015.09	0.63513	721.32	681.43	0.944699	964.16	788.81	0.818132	839.19	778.43	0.927597	346.49	312.44	0.901729	624.6	415.6	0.665386	1065.69
18.548	1001.11	887.82	0.886836	1019.21	880.83	0.864228	1612.09	1182.9	0.733768	1339.4	827.85	0.618075	1267.15	1137.31	0.897534	1549.23	1559.31	1.00651	1419.98	928.08	0.653587	989.22	832.51	0.841582	1125.33	1072.55	0.953098	1156.47	1028.8	0.889604	1620.39	1040.17	0.641926	700.36	674.5	0.963076	956.95	781.29	0.816438	838.07	792.38	0.945482	332.33	293.06	0.881834	627.36	418.4	0.666922	1054.48
19.523	1000.13	883.71	0.883595	1017.57	894.3	0.878858	1604.57	1209.76	0.753947	1342.03	852.25	0.635045	1281.62	1149.6	0.89699	1541.21	1558.04	1.01092	1414.17	923.23	0.652842	991.82	859.99	0.867083	1116.99	1047.4	0.937699	1168.56	1040.87	0.890729	1625.61	1051.89	0.647074	686.47	661.22	0.963218	939.35	783.49	0.834077	805.94	748.67	0.92894	324.89	289.37	0.890671	630.51	431.38	0.684176	1040.04
20.499	999.64	905.57	0.905896	1018.9	894.75	0.878153	1604.21	1199.11	0.747477	1342.83	860.42	0.640751	1273.25	1147.85	0.901512	1538.9	1550.93	1.00782	1419.38	932.58	0.657033	993.67	868.89	0.874425	1100.5	1046.41	0.95085	1155.37	1053.55	0.911872	1610.72	1043.46	0.647822	665.68	643.42	0.966561	932.26	787.39	0.844603	791.39	738.25	0.932852	311.7	283.52	0.909593	623.53	425.96	0.683143	1045.64
21.475	994.24	907.22	0.912476	1022.99	943.81	0.922599	1601.1	1242.3	0.775904	1341.67	868.81	0.647559	1282.87	1167.3	0.909913	1544.76	1555.53	1.00697	1424.61	982.39	0.689585	993.56	859.01	0.864578	1105.4	1057.27	0.956459	1155.28	1060.77	0.918193	1632.48	1080.29	0.661748	648.43	633.92	0.977623	918.85	805.93	0.877107	769.23	729.28	0.948065	299.11	273.58	0.914647	621.9	431.23	0.693407	1036.61
22.451	998.41	931.65	0.933134	1024.61	944.79	0.922097	1601.11	1242.55	0.776055	1337.46	887.11	0.66328	1284.45	1168.34	0.909603	1524.21	1542.83	1.01222	1411.9	973.56	0.689539	990.61	886.16	0.89456	1098	1073.16	0.977377	1146.39	1057.86	0.922775	1611.85	1086.74	0.674219	626.8	598.51	0.954866	904.44	786.23	0.8693	750.76	718.06	0.956444	286.89	266.81	0.930008	627.72	433.57	0.690706	1034.47
23.426	991.09	932.34	0.940722	1020.18	917.47	0.899322	1584.44	1225.93	0.773731	1341.64	903.76	0.673623	1284.42	1174.14	0.91414	1534.36	1569.22	1.02272	1424.22	1004.11	0.705025	982.15	877.1	0.893041	1085.35	1058.18	0.974967	1139.26	1061.03	0.931333	1637.84	1104.57	0.674407	613.04	591.28	0.964505	896.75	806.9	0.899805	726.34	697.01	0.959619	284.14	268.25	0.944077	627.14	436.27	0.69565	1042.45
24.402	991.98	941.84	0.949455	1007.95	917.62	0.910382	1577.6	1252.17	0.793718	1343.15	914.15	0.680602	1286.62	1191.85	0.926342	1524.12	1526.92	1.00184	1415.85	1030.31	0.727697	989.03	913.12	0.923248	1071.25	1040.91	0.971678	1138.71	1051.55	0.923457	1638.12	1146.34	0.69979	602.73	598.98	0.993778	896.74	801.91	0.89425	705.82	677.73	0.960202	271.52	259.6	0.956099	618.63	437.23	0.706771	1058.36
25.378	992.12	956.28	0.963875	1019.63	959.91	0.94143	1569.65	1278.44	0.814475	1353.77	946.27	0.698989	1290.78	1195.19	0.925944	1540.28	1559.49	1.01247	1437.45	1058.33	0.736255	976.52	890.32	0.911727	1076.47	1085.61	1.00849	1132.23	1073.66	0.94827	1630.73	1112.3	0.682087	590.08	584.28	0.990171	879.9	803.19	0.91282	689.99	652.28	0.945347	258.01	244.92	0.949266	621.91	458.74	0.737631	1030.47
26.354	980.83	939.32	0.957679	1013.61	965.67	0.952704	1565.36	1256.18	0.802486	1347.53	943.42	0.700111	1299.82	1214.07	0.934029	1525.49	1555.69	1.0198	1431.47	1056.29	0.737906	982.64	909.64	0.92571	1057.92	1060.43	1.00237	1121.48	1060.76	0.945857	1635.87	1147.01	0.701162	570.09	560.35	0.982915	867.14	780.46	0.900039	673.13	649.64	0.965103	252.06	239.11	0.948623	616.23	473.54	0.768447	1036.46
27.33	978.85	948.58	0.969076	1006.45	953.26	0.947151	1567.12	1292.46	0.824736	1342.33	956.3	0.712418	1306.48	1219.86	0.9337	1530.85	1561.53	1.02004	1420.73	1070.84	0.753725	979.96	896.7	0.915037	1054.92	1050.65	0.995952	1108.3	1073.68	0.968763	1629.66	1164.71	0.714695	559.31	550.4	0.98407	856.36	783.49	0.914907	648.22	632.04	0.975039	241.21	231.6	0.960159	611.86	444.76	0.726898	1025.23
28.305	984.81	960.67	0.975488	1009.01	983.67	0.974886	1562.54	1279.9	0.819115	1349.32	962.29	0.713167	1291.83	1198.11	0.927452	1521.3	1532.21	1.00717	1426.76	1043.78	0.731574	976.51	924.27	0.946503	1039.7	1016.27	0.977465	1109.47	1085.68	0.978557	1629	1180.93	0.724942	540.92	537.97	0.994546	838.67	771.68	0.920124	636.1	634.44	0.99739	230.52	219.21	0.950937	617.44	476.29	0.771395	1018.65
[truncated: 125 more columns]

## Sheet: Figure 5G
Live	Heat-killed	PFA	PFA + GA
0.9868	0.7643	0.6766	0.2762
0.9413	0.8386	0.8406	0.2231
0.8015	0.9453	0.8525	0.06414
0.7736	0.9375	0.9228	0.2577
0.9176	0.7075	0.6292	0.5978
0.9972	0.7354	1.2	0.4088
0.7159	0.7957	1.079	0.4303
0.9478	0.7604	0.857	0.2422
0.9732	0.8907	1.032	0.2677
0.992	1.008	0.9275	0.2918
0.731	0.8682	0.4818	0.2434
0.9652	0.7887	1.033	0.06557
0.9185	0.7441	1.045	0.4515
0.9592	0.613	0.7265	0.06402
0.9485	0.6493

## Sheet: Figure 5H
Live			Heat-killed			PFA			PFA+GA
% spread in Epithelia	% spread in macrophages	total % spread	% spread in Epithelia	% spread in macrophages	total % spread	% spread in Epithelia	% spread in macrophages	total % spread	% spread in Epithelia	% spread in macrophages	total % spread
8.06896	0.290832	8.3598	12.6173	0.320983	12.9383	21.3957	0.398202	21.7939	1.36244	0.930983	2.29342
24.3262	0.398437	24.7246	9.51749	0.320983	9.83847	11.7494	0.938402	12.6878	2.20008	1.10935	3.30943
13.6329	0	13.6329	9.26991	1.02398	10.2939	20.0644	1.09234	21.1567	10.1126	2.20834	12.3209
23.1019	0	23.1019	20.7984	2.23098	23.0294	13.0686	2.20983	15.2784	0	3.30823	3.30823
13.3577	1.29834	14.656	29.8029	0.120982	29.9239	20.4629	3.09821	23.5611	0	2.09328	2.09328
11.2508	2.30088	13.5517	28.8454	3.20398	32.0494	21.0876	8.10982	29.1974	1.19496	0.0983283	1.29329
25.3473	10.0902	35.4376	16.8286	3.20392	20.0325	9.53705	2.20924	11.7463	3.32984	0	3.32984
32.7136	1.20984	33.9235	12.1995	0.109834	12.3093	24.1975	0	24.1975	10.2399	0	10.2399
22.368	2.20938	24.5774	8.12323	0.210982	8.33421	28.1395	0	28.1395	11.1093	0	11.1093
20.692	3.30884	24.0009	0	9.12098	9.12098	24.0909	10.1029	34.1938	2.3201	0	2.3201
20.8721	2.20983	23.0819	1.78141	9.12094	10.9024	1.19196	9.10292	10.2949	0	3.23098	3.23098
11.6809	2.20934	13.8902	7.92805	3.30293	11.231			0	0	3.30934	3.30934

## Sheet: Figure 5J
Live	PFA+GA
34.8982	1.87461
28.4321	2.49287
19.9876	0.0003942
37.8763	6.48275
22.9873	1.3294
24.1843	1.4592
14.3972	5.29482
23.6848	5.39283
12.3876	3.39183
25.9825	1.32948
	0.897482

## Sheet: Figure 5K
Live	PFA+GA
26.6014	9.04417
19.252	8.10437
25.3034	10.8591
17.2495	7.70528
19.2627	5.38796
18.8149	4.56725
16.6414	4.9851
14.8144	5.97528
23.4225	5.23538
20.4276	6.72293
19.4151	10.5058
14.9759	5.36317
15.0225	6.51461
16.1415	6.93996
21.401	6.09151
