# Supplementary material for: Spreading of a mycobacterial cell-surface lipid into host epithelial membranes promotes infectivity
Source: eLife. 2020 Nov 23;9:e60648. doi: 10.7554/eLife.60648 (PMC7735756; doi:10.7554/eLife.60648)
Supplement: Figure 6—source data 1. [file elife-60648-fig6-data1.xlsx]

## Sheet: Figure 6B
	DIM-488 01			DIM-488 02			DIM-488 03			DIM-488 04			DIM-488 05			DIM-488 06			DIM-488 07			DIM-488 08			DIM-488 09			DIM-488 10			DIF-488 01			DIF-488 02			DIF-488 03			DIF-488 04			DIF-488 05			DIF-488 06			DIF-488 07
Time	intensity whole	intensity bleach	normalized intensity	intensity whole	intensity bleach	normalized intensity	intensity whole	intensity bleach	normalized intensity	intensity whole	intensity bleach	normalized intensity	intensity whole	intensity bleach	normalized intensity	intensity whole	intensity bleach	normalized intensity	intensity whole	intensity bleach	normalized intensity	intensity whole	intensity bleach	normalized intensity	intensity whole	intensity bleach	normalized intensity	intensity whole	intensity bleach	normalized intensity	intensity whole	intensity bleach	normalized intensity	intensity whole	intensity bleach	normalized intensity	intensity whole	intensity bleach	normalized intensity	intensity whole	intensity bleach	normalized intensity	intensity whole	intensity bleach	normalized intensity	intensity whole	intensity bleach	normalized intensity	intensity whole
0	1424.87	0	0	1503.58	0	0	1119.45	0	0	1219.24	0	0	1542.06	0	0	618.63	0	0	844.16	0	0	1219.58	0	0	1316.47	0	0	744.25	0	0	491.07	0	0	963.75	0	0	492.69	0	0	319.88	0	0	454.09	0	0	511.59	0	0	1755.07
1.038	1454.84	293.19	0.201527	1556.41	121.16	0.0778458	1121.07	406.31	0.362431	1239.29	160.35	0.129389	1574.16	483.09	0.306887	620.63	83.14	0.133961	834.88	100.32	0.120161	1249.97	283.48	0.226789	1334.64	244.78	0.183405	764.72	195.84	0.256094	505.54	11.23	0.0222139	983.15	60.54	0.0615776	512.7	56.43	0.110064	321.08	10.9	0.0339479	470.81	28.89	0.0613623	510.43	9.09	0.0178085	1692.98
2.076	1469.57	560.99	0.381738	1577.68	243.3	0.154214	1118.96	635.4	0.567849	1231.71	302.48	0.245577	1610.8	799.05	0.496058	599.14	151.27	0.252479	834.27	188.5	0.225946	1277.36	514.01	0.4024	1337.71	428.75	0.32051	765.62	339.81	0.443836	510.25	18.46	0.0361783	1012.39	102.98	0.10172	513.21	98.93	0.192767	334.63	19.83	0.0592595	481.75	60.81	0.126227	509.46	11.4	0.0223766	1700.79
3.14	1460.79	729.55	0.499422	1627.68	379.87	0.233381	1110.46	828.26	0.745871	1230.12	420.24	0.341625	1638.52	952.87	0.581543	600.5	203.58	0.339017	840.67	262.12	0.311799	1285.97	715.03	0.556024	1323.07	623.4	0.471177	756.99	482.63	0.637565	508.65	36.71	0.0721714	1010	145.35	0.143911	496.49	114.63	0.230881	351.38	32.76	0.0932324	485.05	90	0.185548	507.3	22.57	0.0444904	1703.04
4.198	1451.22	857.64	0.590979	1639.54	491.28	0.299645	1118.23	988.34	0.883843	1223.67	525.13	0.429143	1652.8	1196.06	0.723657	594.01	258.51	0.435195	834.12	326.28	0.391167	1306.06	880.89	0.674464	1335.42	780.14	0.584191	755.04	540.18	0.715432	507.55	33.48	0.0659639	1015.72	193.79	0.190791	518.32	160.01	0.308709	358.72	40.54	0.113013	499.06	125.2	0.250872	509.53	28.12	0.0551881	1737.77
5.268	1458.54	1015.31	0.696114	1646.77	630.06	0.382604	1105.42	1082.45	0.979221	1227.07	612.79	0.499393	1654.13	1332.4	0.805499	581.97	273.48	0.469921	840.37	376.95	0.448552	1311.06	941.47	0.718098	1352.46	890.09	0.658127	752.67	606.56	0.805878	521.19	44.02	0.0844606	1011.82	236.42	0.233658	529.36	173.75	0.328227	359.53	47.76	0.13284	499.91	150.91	0.301874	508.31	40.29	0.0792627	1737.89
6.332	1417.72	1063.69	0.750282	1673.54	743.88	0.444495	1094.79	1096.51	1.00157	1210.69	683.23	0.564331	1637.38	1375.01	0.839762	574.11	300.82	0.523976	829.69	409.65	0.493739	1330.67	1026.03	0.771063	1340.78	971.74	0.724757	742.38	652.41	0.878809	503.71	47.31	0.0939231	1024.99	260.87	0.25451	520.16	185.35	0.356333	370.82	70.87	0.191117	490.38	169.34	0.345324	500.85	35.89	0.0716582	1725.9
7.396	1415.53	1122.7	0.79313	1692.03	840.95	0.497007	1073.32	1140.41	1.06251	1212.04	785.38	0.647982	1636.15	1512.42	0.924377	567.19	344.86	0.608015	826.53	457.53	0.553555	1336.54	1115.78	0.834827	1327.9	1060.9	0.798931	741.87	701.21	0.945193	510.37	56.55	0.110802	1033.71	313.78	0.303547	515.08	194.8	0.378194	359.96	59.89	0.16638	484.97	192.58	0.397097	494.78	44.25	0.0894337	1744.73
8.46	1392.17	1160.23	0.833397	1693.91	928.9	0.548376	1073.81	1168.71	1.08838	1207.22	809	0.670135	1628.68	1544.5	0.948314	557.55	360.09	0.645843	814.26	505.44	0.620735	1340.45	1163.97	0.868343	1307.43	1080.75	0.826622	737.58	726.89	0.985507	509.59	57.7	0.113228	1038.81	341.12	0.328376	524.43	238.4	0.454589	364.68	64.19	0.176017	467.49	208.65	0.44632	497.92	47.21	0.0948144	1731.14
9.526	1381.82	1234.1	0.893098	1699.69	1011.11	0.594879	1044.34	1187.35	1.13694	1193.82	856.89	0.717772	1627.12	1539.66	0.946249	546.81	359.38	0.65723	802.97	518.38	0.645578	1339.22	1212.38	0.905288	1286.18	1109.5	0.862632	731.72	759.35	1.03776	497.13	63.86	0.128457	1029.12	379.23	0.368499	534.43	263.1	0.4923	366.38	62.95	0.171816	457.59	224.43	0.490461	491.11	52.57	0.107043	1753.75
10.584	1382.89	1303.86	0.942852	1703.51	1082.42	0.635406	1030.41	1182.15	1.14726	1190.56	906.95	0.761784	1639.28	1623.91	0.990624	542.65	372.93	0.687239	799.53	550.54	0.68858	1348.02	1270.87	0.942768	1269.09	1112.19	0.876368	728.94	773.56	1.06121	502.48	71.43	0.142155	1039.84	396.93	0.381722	532.75	265.42	0.498207	358.47	61.21	0.170753	469.72	238.44	0.507622	490.41	53.05	0.108175	1730.26
11.654	1381.22	1300.86	0.94182	1690.69	1135.83	0.671814	1028.62	1195.49	1.16223	1183.07	929.33	0.785524	1622.78	1656.73	1.02092	528.29	350.02	0.662553	789.43	552.8	0.700252	1347.58	1305.57	0.968826	1264.98	1164.26	0.920378	711.22	762.46	1.07205	504.72	71.76	0.142178	1045.78	415.25	0.397072	542.7	280.04	0.516013	357.6	66.75	0.186661	465.79	263.42	0.565534	489.45	70.43	0.143896	1723.16
12.712	1369.53	1340.59	0.978869	1683.22	1184.4	0.703651	1010.39	1200.02	1.18768	1173.1	965.06	0.822658	1594.36	1638.4	1.02762	513.48	372.51	0.725462	788.06	593.71	0.753382	1356.85	1295.86	0.95505	1252.37	1152.38	0.920159	716.59	805.94	1.12469	503.09	92.43	0.183725	1055.01	460.54	0.436527	532.68	293.39	0.550781	354.35	65.13	0.183801	472.52	277.09	0.586409	483.34	71.66	0.14826	1718.92
13.782	1359.07	1355.08	0.997064	1692.55	1251.42	0.73937	1013.03	1194.03	1.17867	1158.76	1000.37	0.863311	1583.59	1724.2	1.08879	506.31	388.17	0.766665	776.11	602.32	0.776076	1344.65	1318.27	0.980382	1239.89	1199.24	0.967215	703.08	796	1.13216	485.76	85.27	0.175539	1050.71	462.93	0.440588	521.64	295.08	0.565677	359.16	75.7	0.21077	467.35	299.3	0.640419	484.33	77.9	0.160841	1669.13
14.846	1321.79	1353.51	1.024	1698.76	1293.74	0.761579	990.46	1168.96	1.18022	1148.47	1010.32	0.87971	1589.3	1726.39	1.08626	496.15	380.56	0.767026	773.91	619.71	0.800752	1342.63	1338.13	0.996648	1228.29	1222.57	0.995343	702.36	824.62	1.17407	496.27	91.23	0.183831	1046.43	496.24	0.474222	515.36	316.08	0.613319	347.83	70.5	0.202685	457.05	285.55	0.624768	479.44	79.08	0.164942	1648.31
15.904	1297.87	1319.67	1.0168	1702.91	1314.87	0.772131	978.41	1171.57	1.19742	1128.4	1039.67	0.921367	1565.18	1743.69	1.11405	485.52	372.71	0.767651	763.8	642.03	0.840573	1336.67	1334.22	0.998167	1215.84	1198.55	0.985779	675.53	782.17	1.15786	490.8	94.7	0.19295	1054.67	523.73	0.496582	509.76	323.55	0.63471	357.04	76.58	0.214486	453.18	302.45	0.667395	478.45	91.58	0.19141	1624.46
16.968	1297.75	1343.65	1.03537	1674.46	1371.79	0.819243	971.79	1163.86	1.19765	1133.21	1045.57	0.922662	1557.87	1738.08	1.11568	492.17	406.07	0.82506	760.41	640.83	0.842743	1342.15	1344.9	1.00205	1212.29	1272.12	1.04935	686.62	832.15	1.21195	496.03	95.89	0.193315	1050.39	518.01	0.49316	509.45	314.62	0.617568	351.31	84.54	0.240642	422.34	294	0.696122	464.94	89.3	0.192068	1618.22
18.04	1298.5	1332.7	1.02634	1681.14	1394.71	0.829622	955.36	1187.05	1.24252	1116.48	1049.44	0.939954	1567.35	1797.27	1.14669	471.17	381.12	0.80888	749.18	656.31	0.876038	1338.08	1347.28	1.00688	1194.64	1246.84	1.0437	679.65	813.98	1.19765	491.12	106.56	0.216973	1034.1	540.99	0.523151	518.48	327.31	0.631288	354.96	81.21	0.228786	434.53	314.46	0.723678	471.08	91.06	0.193301	1569.05
19.104	1275.02	1335.46	1.0474	1667.92	1437.25	0.861702	953.91	1162.46	1.21863	1110.51	1062.88	0.95711	1566.17	1760.32	1.12396	467.02	401.7	0.860134	749.38	659.3	0.879794	1324.17	1355.66	1.02378	1181.55	1241.49	1.05073	670.24	802.66	1.19757	489.9	120.12	0.245193	1045.22	563.45	0.539073	518.29	352.72	0.680546	348.74	83.19	0.238544	442.92	323.16	0.729613	463.25	99.62	0.215046	1551.96
20.168	1262.1	1334.98	1.05775	1654.01	1435.74	0.868036	941.34	1148.27	1.21982	1095.74	1068.79	0.975405	1550.93	1709.61	1.10231	459.47	383.52	0.834701	735.6	678.26	0.92205	1318.14	1371.74	1.04066	1178.77	1216.43	1.03195	672.01	812.51	1.20907	482.73	98.68	0.204421	1048.02	586.05	0.559197	506.31	342.63	0.67672	327.14	84.53	0.258391	437.46	326.99	0.747474	462.7	101.24	0.218803	1544.51
21.232	1244.25	1329.97	1.06889	1655.22	1468.34	0.887097	932.61	1116.7	1.19739	1087.76	1083.77	0.996332	1535.15	1708.28	1.11278	447.94	388.9	0.868197	722.28	694.64	0.961732	1305.97	1378.65	1.05565	1170.47	1280.44	1.09395	664.37	848.84	1.27766	489.89	127.79	0.260854	1060.54	597.77	0.563647	490.74	335.8	0.684273	332.31	80.07	0.24095	428.42	333.37	0.778138	458.44	105.9	0.231001	1593.83
22.29	1229.71	1333.83	1.08467	1672.57	1497.93	0.895586	904.94	1140.02	1.25977	1075.6	1078.11	1.00233	1507.26	1776.26	1.17847	444.94	408.8	0.918776	716.62	667.26	0.931121	1306.44	1387.06	1.06171	1162.27	1249.81	1.07532	659.24	820.73	1.24496	481.25	120.84	0.251096	1066.56	624.28	0.585321	515.29	365.55	0.709406	325.65	93.32	0.286565	429.2	325.77	0.759017	465.1	99.32	0.213545	1589.59
23.354	1229.64	1317.77	1.07167	1629.18	1484.69	0.911311	895.74	1088.04	1.21468	1062.87	1061.9	0.999087	1516.56	1731.7	1.14186	436.37	404.65	0.927309	710.46	686	0.965572	1299.47	1379.24	1.06139	1165.48	1247.27	1.07018	659.06	825.1	1.25193	474.93	118.01	0.248479	1066.01	653.19	0.612743	503.05	368.93	0.733386	340.15	98.19	0.288667	417.93	331.21	0.792501	449.63	111.27	0.24747	1580.94
24.418	1214.18	1340.36	1.10392	1628.54	1513.94	0.92963	892.44	1126.92	1.26274	1061.87	1088.15	1.02475	1518.46	1744.8	1.14906	434.55	402.91	0.927189	707.89	697.63	0.985506	1301.07	1356.72	1.04277	1129.59	1214.58	1.07524	639.32	779.42	1.21914	483.83	130.98	0.270715	1056.15	659.67	0.624599	489.08	359.72	0.735503	344.01	104.9	0.304933	427.95	352.64	0.824021	453.65	110.04	0.242566	1569.79
25.488	1201.5	1324.37	1.10226	1612.2	1491.38	0.925059	885.78	1055.42	1.19151	1045.27	1097.12	1.0496	1486.45	1664.43	1.11973	430.35	398.68	0.926409	695.13	690.92	0.993944	1295.39	1344.38	1.03782	1119.22	1245	1.11238	634.69	797.84	1.25705	480.25	131.01	0.272795	1048.78	623.34	0.594348	505.55	364.84	0.721669	342.25	104.7	0.305917	416.96	343.23	0.823172	440.94	117.65	0.266816	1553.03
26.552	1182.64	1311.44	1.10891	1630.18	1547.91	0.949533	886.6	1081.11	1.21939	1034.21	1089.01	1.05299	1486.79	1682.88	1.13189	425.75	380.72	0.894234	688.68	666.6	0.967939	1293.04	1311.42	1.01421	1122.44	1224.44	1.09087	633.53	824.37	1.30123	470.97	137.3	0.291526	1045.4	679.63	0.650115	493.4	373.33	0.756648	337.94	102.35	0.302864	418.73	330.63	0.789602	438.46	136.52	0.311362	1527.54
27.616	1182.27	1283.02	1.08522	1608.82	1546.55	0.961295	875.04	1091.63	1.24752	1034.6	1095.11	1.05849	1494.17	1720.63	1.15156	418.87	419.74	1.00208	683.65	663.11	0.969955	1277.45	1311.74	1.02684	1109.05	1200.88	1.0828	630.2	783.5	1.24326	470.65	145.04	0.30817	1037.24	648.95	0.625651	495.69	370.21	0.746858	344.45	111.72	0.324343	421.79	346.45	0.82138	447.19	138.32	0.309309	1520
28.676	1147.75	1292.15	1.12581	1616.9	1588.25	0.982281	863.73	1057.14	1.22392	1016.12	1104.8	1.08727	1476.2	1631.99	1.10553	417.49	395.74	0.947903	674.22	653.59	0.969402	1274	1353.29	1.06224	1099.82	1269.19	1.154	616.8	775.42	1.25717	477.57	146.91	0.30762	1051.5	686.21	0.652601	492.12	382.23	0.776701	333.26	104.43	0.313359	394.77	362.32	0.9178	434.84	125.2	0.287922	1516.75
29.74	1154.13	1264.78	1.09587	1596.95	1549.49	0.970281	862.91	1039.98	1.2052	1008.92	1076.72	1.0672	1459.08	1655.23	1.13443	405.4	370.23	0.913246	667.8	660.08	0.98844	1255.08	1343.15	1.07017	1092.51	1248.51	1.14279	612.44	765.66	1.25018	481.97	149.54	0.310268	1064.32	686.77	0.645266	504.52	397.18	0.787243	336.12	115.57	0.343836	401	354.59	0.884264	428.27	128.5	0.300044	1530.19
[truncated: 8 more columns]

## Sheet: Figure 6C
DIM-488	DIF-488
1.253	0.286
1.11	0.4565
1.043	0.4743
1.05	1.179
0.9635	0.9906
1.135	0.4233
1.104	0.8376
1.218	0.7638
1.054	0.6334
1.099

## Sheet: Figure 6F
DIM-488 2hpi			DIF-488 2hpi			DIM-488 24hpi			DIF-488 24hpi
% spread in Epithelia	% spread in macrophages	total % spread	% spread in Epithelia	% spread in macrophages	total % spread	% spread in Epithelia	% spread in macrophages	total % spread	% spread in Epithelia	% spread in macrophages	total % spread
3.37221	0.000320698	3.37253	2.88312	0.465278	3.34839	1.28444	52.1209	53.4053	11.0396	30.5023	41.5419
6.47733	3.94891	10.4262	2.60647	1.3535	3.95998	0.62583	46.6397	47.2655	0.15537	80.1136	80.269
9.84279	0.582361	10.4252	1.6817	0.277281	1.95898	10.3804	20.4154	30.7959	8.19423	47.4573	55.6516
7.89159	0	7.89159	3.62342	0.811817	4.43523	8.7617	11.1299	19.8916	1.8795	21.8986	23.7781
8.47009	0.923857	9.39395	0.513908	0.137193	0.651101	28.2	31.1578	59.3577	2.34255	71.2741	73.6166
4.68096	0.0791042	4.76007	0	0.900071	0.900071	3.35818	8.0453	11.4035	2.34195	46.1505	48.4924
29.4736	0.651101	30.1247	4.39137	0.422382	4.81375	36.1428	21.9059	58.0487	11.1542	25.8108	36.965
2.04262	1.33363	3.37625	4.79186	0.000108944	4.79197	6e-05	55.7378	55.7378	5.44381	54.0139	59.4577
7.67962	0	7.67962	2.33408	0.395651	2.72973	43.8916	12.059	55.9506	3.86165	51.3878	55.2495
6.30335	0	6.30335	2.22017	0.0155051	2.23568	37.7077	18.2458	55.9535	7.21006	56.8548	64.0649
8.92907	0	8.92907	0	6.39622	6.39622	1.73391	36.5228	38.2567	0.82729	69.1202	69.9475
20.0586	0	20.0586	1.38886	0.023363	1.41222	2.1024	22.6351	24.7375	7.62386	40.4644	48.0883
4.14057	0.0152991	4.15587	2.96041	0	2.96041	1.67927	28.63	30.3092	26.2189	20.4651	46.684
6.35082	0.389402	6.74022	5.58841	0.205358	5.79377	10.9407	48.2553	59.1961	4.10709	57.4634	61.5705
10.6971	0.0170089	10.7142	5.22737	1.11651	6.34389
