# Supplementary material for: Spreading of a mycobacterial cell-surface lipid into host epithelial membranes promotes infectivity
Source: eLife. 2020 Nov 23;9:e60648. doi: 10.7554/eLife.60648 (PMC7735756; doi:10.7554/eLife.60648)
Supplement: Figure 7—source data 1. [file elife-60648-fig7-data1.xlsx]

## Sheet: Figure 7A
WT Live	WT Heat-killed	WT PFA	WT PFA + GA	∆mmpL7 Live	∆mmpL7 Heat-killed
10	2	2	7	7	10
7	3	1	8	10	7
12	0	4	9	12	8
8	1	0	10	13	9
6	0	5	12	8	12
13	3	2	13	9	13
10	2	3	12	10	11
11	5	0	10	11	9
9	6	0	9	6	4
12	4	1	8	7	7
10	0	3	7	5	3
14	2	0	5	10	10
13	1	5	9	4	15
9	3	4	12	12	13
				15	11

## Sheet: Figure 7B
MYD88(+) Live	MYD88(-) Live	MYD88(+) PFA+GA	MYD88(-) PFA+GA
11	8	9	5
9	9	8	4
7	4	10	3
8	10	12	4
3	12	13	9
10	14	14	4
13	9	15	2
12	8	10	5
9	5	12	9
6	9	9	8
7	7	8	3
8	11	5	4
13	10	9	5
9	9	10	6

## Sheet: Figure 7C
Live	Heat-killed	PFA	PFA+GA
30951.8	15110	7662.8	17322.2
37636.3	17307.5	24820	25365.4
37390.5	37151.3	54893.2	15324.5
18935.7	49448.1	37398.4	8861
37458	20325.2	41314	17772.9
52029.8	11475.2	53163.5	17178.1
30046.9	28008.5	28440.1	15088.6
52509	15587	19537.7	17936
4645.56	40158.9	5064.64	12014.6
22233.3			13775

## Sheet: Figure 7D
MYD88(+) Live	MYD88(-) Live	MYD88(+) PFA+GA	MYD88(-) PFA+GA
2248.62	9087.08	1474.73	4074.38
2072.71	3008.62	482.19	4554.69
2249	6568.24	4318.23	4069.53
3004.07	4340.73	1402.15	338.07
4760.6	4177.34	1072.4	4522.29
3260.68	4402.99	1403.1	4153.75
2811.8	3901.07	829.725	7315.72
5402.07	6846.79	4224.78	5577.31
6978.4	4851.52	371.69	5463.35
4277.98	4046.5	2413.48	4515.62
3773.15	8054.92	287.868	4615.1
5090.22	6814.54	1632.85	5929.23
6308.36	3549.86	797.542	5364.29
8648	6280.96	1379.81	4279.06
3754.86	6809.79	1334.51	2962.3
5262	3552.2	1868.62	5333.1
8082.2	4389.24	1017.29	4241.55
3954.76	8002.64	663.174	2242.69
7861	5872.1	1817
	7061.85	1811.37

## Sheet: Figure 7E
Native	DIM-	+PDIM	+PDIF
19609.1	8104.07	11456.8	832.786
8737.89	2142.74	14647.5	3000
9727.83	5635.07	11642.1	5179.24
6417.67	3301.34	2702.08	781.8
6720.11	6205.7	2488.76	767.11
16565.6	7195.11	7343.76	756.469
15036.4	3898.47	6861.74	955.5
13047.1	4478.42	7812.94	1151.2
10576.1	574.181	5339.1	1426.7
13200.6	5089.88	8554.22	2626.28
10713.5	5972.34	6913.05	1779.43
20305.8	5324.39	11273.7	5751.38
10634.6	5325.2	9729.11	772.914
10219.6	3670.89	4983.31	2014.77
10055.4	7392.04	8044.59	1440.8
5263.17	141.36	10000.8	2156
1940.45	3047.5	5635.28	3484.99
5247.2	4247.81	6281.52	2993.5
10829.8	886.8	12695.2	4950.07
14118.1	85.3	7523.14	3903.1
4898.85	2176.6	7659.93	571.65
10479.9	3812.72	7069.18	1880.03
11308.4	6918.45	5002.65	234.9
10050.9	6604.42	8620.82	458.771
11299.4	0	9910.06	1878
	0	8507.65	3779.34
	0	22078.6	3684
			3635.11
			2649.42
			6594.14
