# Supplementary material for: Spreading of a mycobacterial cell-surface lipid into host epithelial membranes promotes infectivity
Source: eLife. 2020 Nov 23;9:e60648. doi: 10.7554/eLife.60648 (PMC7735756; doi:10.7554/eLife.60648)
Supplement: Figure 8—figure supplement 1—source data 1. [file elife-60648-fig8-figsupp1-data1.xlsx]

## Sheet: Supplemental Figure 8D
Distance across bacteria (µm)	WT wasabi											WT AzidoPE											∆mmpL7 Wasabi														∆mmpL7 AzidoPE
0	53		71	88	74	63	263	291	70	39	39	208	423	186	332	309	214	534	525	188	88	128	76	100	56	60	43	41	53	100	61	74	56	42	44	50	311	354	193	271	116	105	120	234	257	304	116	121	127
0.114	60	85	71	88	74	82	498	515	94	39	39	246	426	186	332	309	336	717	816	385	88	128	183	200	87	110	63	79	115	250	117	71	59	50	52	97	580	756	461	609	292	387	298	421	399	350	158	178	216
0.227	101	108	276	513	426	211	741	832	123	45	66	430	520	598	752	801	524	995	1112	744	113	248	564	654	254	431	119	124	336	250	474	112	105	124	81	245	859	1095	1045	1375	795	760	517	421	743	474	363	648	1167
0.341	267	149	903	1207	1288	383	1067	1265	427	58	122	667	899	836	884	929	715	1273	1638	1585	265	427	1388	1551	529	800	202	263	727	491	841	224	157	378	240	1334	1165	1219	1529	1677	1232	1234	780	1052	1150	1007	534	1197	2284
0.454	732	681	2811	3041	2848	951	1509	1910	1030	270	641	734	895	860	870	876	812	1985	2278	2004	524	683	2419	2559	1094	1534	930	837	2034	825	1245	711	278	1441	1352	1880	1428	1395	1666	1759	1884	1875	1046	1491	1640	1784	805	1425	3402
0.568	1382	1363	3591	3707	3229	2014	2107	3181	1861	723	1294	844	893	860	910	895	895	2284	2686	2318	805	780	3090	3579	2279	2389	2970	2936	3012	1242	2083	1183	1082	2182	1874	1880	1355	1359	1774	2051	1851	1942	995	1971	2425	2123	1201	1287	3169
0.681	1914	1956	3696	3825	3193	2145	2903	4038	2430	1315	1834	906	909	852	860	993	989	2680	2855	2180	920	798	3282	3968	2737	2764	3616	3809	3541	1865	2304	1512	1697	2182	1874	2658	1363	1325	2125	2223	1913	1862	1024	2179	2683	2107	1029	1287	3169
0.795	2260	2587	3899	3741	3096	2488	3362	4095	2768	1687	1991	1020	950	1005	1003	1035	1026	2686	2679	2258	809	817	2821	3607	3106	2809	3848	4066	3662	2333	2227	1604	2001	2241	2230	2725	1455	1514	2117	1942	2154	2056	1008	1962	2119	2041	1036	1192	3490
0.908	2283	2568	3029	2198	1859	2266	3793	4095	2436	1955	1912	1054	1067	962	858	930	984	2464	2582	2217	758	1093	2169	2695	2975	2378	3570	3510	3287	2419	1451	1504	1999	2306	1985	2594	1301	1387	2028	1832	2399	2222	1042	2169	1926	2355	1152	1196	3833
1.022	1638	2477	1771	984	927	1877	3446	3669	1890	1658	1321	883	1091	779	478	572	985	2508	2504	1812	700	889	1371	1543	2723	1654	2235	2364	2034	2035	862	1206	1507	1922	1235	1692	1176	1108	1951	1270	2106	2017	1088	2041	2043	2345	919	1502	3427
1.135	1010	2033	440	189	211	1354	2916	2882	1176	1018	595	646	870	298	141	204	703	2183	2128	1255	569	738	703	800	1654	1317	698	590	2034	1667	199	624	1507	1268	577	542	931	874	1270	1168	980	813	1088	2001	1375	1588	919	1400	2035
1.249	505	1098	440	189	211	518	2082	1769	539	381	246	476	457	298	141	204	339	1685	1727	708	359	479	320	413	1036	793	272	290	1244	993	103	267	830	348	144	219	564	615	852	757	414	465	779	1437	896	831	625	649	538
1.362	198	541	113	75	64	314	1043	855	206	131	106	302	309	157	103	85	295	1177	1180	343	182	162	197	232	527	189	75	78	547	993	99	118	398	162	74	88	352	368	565	347	169	118	451	1437	556	436	373	309	273
1.476	85	206	58	62	51	124	445	353	84	59	54	202	325	74	80	81	200	625	514	204	105	112	108	175	151	109	75	78	189	390	56	75	170	54	47	88	226	288	235	185	169	118	234	958	251	225	249	134	103
1.589	54	211	49	46	33	59	200	171	50	47	41	155		66	72	77	150	330	259	106	80	85	91	112	76	58	44	45	76	111	60	67	125	54	47	51	159	239	156	107	73	51	122	388	282	187	169	134	103
[truncated: 1 more columns]

## Sheet: Supplemental Figure 8E
control	mbcd	cholesterol	mbcd_cholesterol
4.68782	0.388195	10.5078	2.80595
4.05491	0.911834	22.4618	2.2265
3.19982	0.353745	30.4504	2.19587

## Sheet: Supplemental Figure 8F
control	MBCD	Cholesterol	MBCD + Cholesterol
28.3055	13.0798	34.1893	22.2302
34.0508	16.1845	59.8214	27.141
37.8953	11.0351	32.514	30.7487
30.013	9.19549	35.094	30.8603
34.2471	6.48055	27.6885	37.2368
27.0674	5.35806	33.514	45.1113
31.5031	15.8046	34.7314	32.8811
36.3047	9.49551	35.9779	34.6095
26.8817	5.84079	30.0758	39.5674
27.9267	9.66326	46.7067	2.47934
29.8131	12.5091	41.3927	18.7061
29.3348	9.98651	46.0643	29.5835
33.0613	5.59204	43.7847	35.8404
35.8472	9.96123	52.973	28.7126
29.2018	9.24383	32.9905	30.683
