# Supplementary material for: Spreading of a mycobacterial cell-surface lipid into host epithelial membranes promotes infectivity
Source: eLife. 2020 Nov 23;9:e60648. doi: 10.7554/eLife.60648 (PMC7735756; doi:10.7554/eLife.60648)
Supplement: Figure 8—source data 1. [file elife-60648-fig8-data1.xlsx]

## Sheet: Figure 8B
Distance (µm)	WT Wasabi																								WT AF647																								∆mmpL7_Wasabi
0	57	45	52	40	44	38	41	46	40	49	53	49	252	40	29	33	118	44	32	31	59	100	37	39	731	743	713	814	537	609	732	721	538	461	559	484	1227	414	454	500	704	567	617	604	513	908	614	480	40
0.113	57	96	64	74	44	38	58	63	58	84	84	67	165	95	40	62	134	96	47	49	46	113	55	64	731	757	735	880	537	753	692	850	562	523	590	546	984	472	543	506	704	621	690	645	513	734	522	529	50
0.227	358	579	219	301	162	207	113	158	109	152	146	101	217	430	129	304	242	335	201	167	103	360	156	151	1300	1079	815	1354	699	1031	801	1422	817	689	815	706	828	622	743	549	1003	869	880	637	563	715	635	746	156
0.34	1714	997	627	760	822	207	211	335	177	275	351	208	386	947	441	942	673	890	574	745	489	1083	402	151	1593	1684	1051	2059	1408	1031	892	1665	1043	1103	1248	1017	1101	1143	1346	916	1363	1298	1331	1000	961	767	743	746	426
0.454	1714	1369	878	865	1291	520	691	583	451	662	983	436	746	1556	1164	1414	1275	1586	851	1407	1244	1902	941	793	1593	1940	1399	2177	1882	1425	1675	1769	1286	1552	1402	1501	1431	1712	1817	1276	1500	1687	1534	1497	1443	931	1017	1416	1010
0.567	2588	1864	1166	1409	1530	947	691	995	997	1133	1317	1072	1356	2021	1732	2315	1642	1998	1300	2076	1729	2641	1538	1862	1284	2168	1583	2432	2078	1976	1675	1816	1430	1818	1581	1563	1578	1867	1838	1486	1397	1733	1587	1768	1793	1228	1266	1766	2097
0.681	2409	2503	1417	1819	1854	1199	2183	1331	1163	1602	1518	1544	1613	2010	1941	2741	1926	2000	1564	2327	2174	3510	1951	1923	1451	1955	1577	2112	2135	2026	2782	1953	1442	1737	1566	1605	1584	1617	1611	1435	1333	1780	1431	1817	1824	1586	1309	1765	3332
0.794	2409	2489	1787	1776	2154	1325	3150	1297	1542	1807	1631	1810	1739	1935	2092	3078	1657	1697	1600	2438	2229	3881	1822	2021	1451	1859	1410	1952	2199	1969	2865	2091	1714	1762	1706	1706	1513	1657	1696	1330	1471	1943	1405	1771	1711	1629	1498	1730	3859
0.908	1446	2419	1900	1636	1772	1181	3732	888	1283	1754	1424	1814	1695	1492	2019	2571	1212	1191	1266	2438	1986	3240	1271	2021	1622	1714	1305	1882	1973	1833	2611	2009	1763	1719	1822	1797	1581	1728	1843	1418	1627	1874	1497	1648	1816	1457	1463	1730	3953
1.021	904	1598	1704	1085	1772	892	3562	683	1223	1247	890	1537	1333	844	1307	1470	584	568	812	1754	1467	2521	668	1255	1510	1766	1272	2047	1973	1829	2522	1663	1472	1722	1919	1755	1632	1915	1974	1484	1349	1667	1425	1999	1903	1325	1331	1741	4095
1.135	195	1078	1132	798	1159	382	3505	338	666	798	421	1006	772	367	762	504	250	215	290	737	870	1962	213	714	851	1950	1427	2025	2063	1645	2657	1102	750	1300	1272	1369	1346	1605	1929	1335	979	1150	1109	2025	1752	1250	1039	1729	3812
1.248	124	607	585	697	725	382	2141	173	299	433	196	476	301	112	320	239	92	95	145	390	286	1193	57	119	706	1937	1571	1899	1797	1645	2865	941	487	841	777	1005	995	1093	1083	912	714	724	979	1692	1280	1269	804	1199	2852
1.362	51	113	293	280	122	104	998	71	299	135	112	227	96	64	98	104	53	49	113	157	119	371	34	34	668	1187	1467	1263	1107	1109	2370	737	487	594	516	556	667	655	549	735	608	603	724	1227	772	1249	642	660	1419
1.475	51	74	82	140	85	63	154	31	92	48	53	77	45	44	60	54	37	34	178	84	59	113	32	34	668	912	1000	918	833	850	1218	639	478	482	479	480	494	574	462	580	672	564	1113	808	518	1009	472	660	638
1.589	46	55	51	143	47	30	76	25	31	55	48	42	38	32	35	30	29	29	348	52	39	57	25	29	686	771	790	829	563	623	721	615	468	449	488	462	491	533	454	579	599	624	1367	797	477	787	420	617	296
[truncated: 47 more columns]

## Sheet: Figure 8D
DMSO	Atorvastatin	Cholesterol	Atorvastatin + Cholesterol
0.82858	0.576166	1.00668	0.910755
0.874428	0.638671	0.869635	0.982878
0.81183	0.695423	0.966601	0.967349

## Sheet: Figure 8F
DMSO			Atorvastatin
% spread in Epithelia	% spread in macrophages	total % spread	% spread in Epithelia	% spread in macrophages	total % spread
8.50893	0	8.50893	1.77748	0.137723	1.91521
11.3715	0.0137112	11.3853	6.61771	0	6.61771
4.93338	1.73968	6.67306	2.98074	0.158423	3.13916
14.6485	0.199996	14.8485	12.1637	1.86762	14.0313
3.808	2.96255	6.77055	7.7706	1.51287	9.28347
15.7459	0	15.7459	9.40846	5.04217	14.4506
12.8525	1.88121	14.7337	1.8518	1.0299	2.8817
21.7905	1.88383	23.6743	2.03283	0.70018	2.73301
9.70602	0.795625	10.5016	1.04542	4.29303	5.33845
7.19337	2.96094	10.1543	3.84588	0.0980608	3.94394
19.855	0.176158	20.0311	5.83991	0.603232	6.44314
13.0253	1.47379	14.4991	9.84048	0.314185	10.1547
16.3964	1.15309	17.5495	6.27176	5.59178	11.8635
15.6931	0.184456	15.8775	1.02933	0.930054	1.95938
8.74941	0.580465	9.32987	1.48844	0.00100035	1.48944
12.3754	0.0322226	12.4076	1.23065	0.0343713	1.26502
14.5702	6.54776e-06	14.5702	1.30665	0.863579	2.17023
16.5522	1.3397	17.8919

## Sheet: Figure 8G
dmso 1dpi	atorvastatin 1dpi	dmso 3dpi	atorvastatin 3dpi
2554.7	959.9	4417.3	3679
2966.6	859.9	5441	120
2611.9	1177.9	7907.7	3405
1877.1	2265	7065.7	5666.4
1177	1339	4133.5	5962
2734	1730.7	9721.3	3727
1486	2412.9	10699.3	719
2873	2543.2	3935.5	4562.1
3128.1	163	3673.4	4444.6
654.5	457.4	10809.6	2670
1572	1749.9	8714.5	786.3
3315.9	3279	4055.2	1967.5
2961.1	1931.1	11834	2173.9
1748.9	2594.5	5808.8	3168
2161.3	3320	9457	8896.1
1203.7	2411.5	6881.8	2995
1814.3	3389.7	11502.7	1659.8
1478.7	1922.1	9958.9	4422.9
1818.3	4779.4	7116.5	4146
636.6	2670.7	5106.7	3891.4
1426.8	935	5851.6	6188.4
4864.9	493.2	6361.4	6809.9
1527.5	1834.6	11082.6	4029
1701.3	2794	3760	2803.7
2057.2	1501	7853	3130.2
3380.6	4470.5	8349.6	9298.6
1374.5	1498.4	2791.8	5374.1
2147.2	1199	10709.2	7996
2598.4	2481.3	5124.6	288.2
1678.6	1227.1	8155.9	7704.9
2076.5	1545.7	2709.1	3745.4
1336.1	2271.8	4697	128
3669.7	2344.6	5526.8	5930.8
2440.2	2846.1	6184	4089.4
1415.3	1380	1297.6	2010.2
	3406		5034.7
	2510.1		5222.8

## Sheet: Figure 8H
	Infected	Uninfected
DMSO	32	2
Atorvastatin	18	19
Cholesterol	34	1
Atorvastatin + Cholesterol	32	4

## Sheet: Figure 8I
	Infected	Uninfected
MYD88(+) DMSO WT	36	4
MYD88(+) Atorvastatin WT	20	22
MYD88(-) DMSO WT	35	4
MYD88(-) Atorvastatin WT	35	5
MYD88(+) DMSO ∆mmpL7	15	25
MYD88(+) Atorvastatin ∆mmpL7	18	24
MYD88(-) DMSO ∆mmpL7	33	8
MYD88(-) Atorvastatin ∆mmpL7	35	7
