# Supplementary material for: Spreading of a mycobacterial cell-surface lipid into host epithelial membranes promotes infectivity
Source: eLife. 2020 Nov 23;9:e60648. doi: 10.7554/eLife.60648 (PMC7735756; doi:10.7554/eLife.60648)
Supplement: Supplementary file 2. [file elife-60648-supp2.docx]

**NMR SPECTRA**

1H NMR

500 MHz

CDCl3


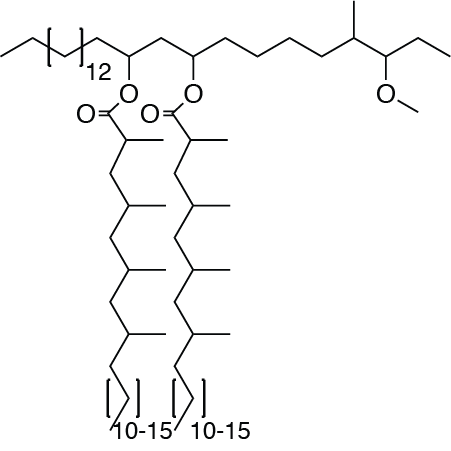
PDIM

13C NMR

126 MHz

CDCl3

1H NMR

500 MHz

CDCl3

Azido-DIM


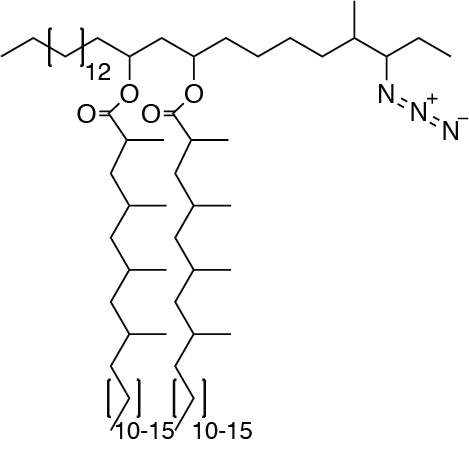


13C NMR

126 MHz

CDCl3

1H NMR

500 MHz

CDCl3

PDIF


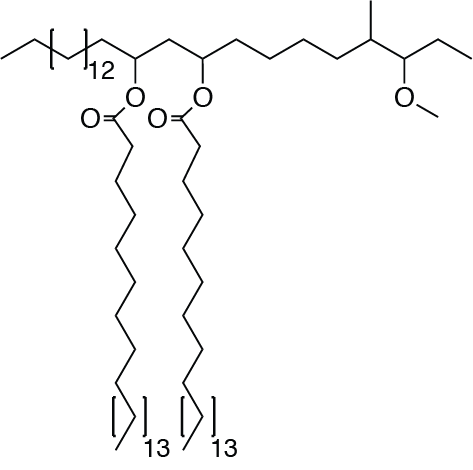


13C NMR

126 MHz

CDCl3

1H NMR

500 MHz

CDCl3

Azido-DIF


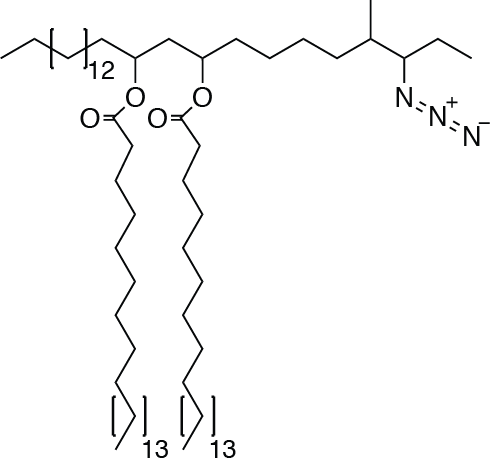


13C NMR

126 MHz

CDCl3

1H NMR

500 MHz

CDCl3

Control bacteria - petroleum ether extract

1H NMR

500 MHz

CDCl3

Recoated bacteria – petroleum ether extract
